# Supplementary material for: Prevalence of abnormal kidney function and 90-days outcomes among patients admitted on medical wards of Masaka Regional Referral Hospital in Uganda: a prospective study
Source: Research Square preprint supplement (doi:10.21203/rs.3.rs-1322172/v1), 2022-02-16
Supplement: Supplementary file 1 [file d5fe0643dc9762843b2c5372.xlsx]

## Sheet: Legends
Additional file 1: Prevalence of abnormal kidney function and 90-days outcomes among patients admitted on medical wards of Masaka Regional Referral Hospital in Uganda: a prospective study. This excel sheet shows dataset generated and/or analyzed during the study.

## Sheet: Dataset
study	recruitmen	Age	Sex	Tribe	Marital status	Ed Level	Religion	Occupation	Other Occupation	Have you ever had history of diarrhea or excessive vomiting in past 3 months?	Has the patient suffered any illnes in past 3 months?	Do you take alcohol?	If yes CAGE score	Do you smoke	Do you have family history of kidney disease?	History of chronic diseases like diabetes	hypertension	liver disease	heart disease	urologicaldisease	cancer	others	Which drugs have you been taking over the past 3 months None	Herbal Drugs	NSAIDS	specify	What is your HIV status	If HIV positive, are you on ART?	How long have you been on ART (years)	If positive what is your current ART regimen	What other ART regimens have you taken before	Vitals BP;	PR rate	Axillary temperature	Quick SOFA score;	Systolic BP ≤100mmHg	GCS score <15	RR≥22 Abreathes/minute	Serological HIV test	Serum creatinine	eGFR	eGFR grades	Proteinuria on dipstick	Patient with initial proteinuria of ≥1+ or decreased eGFR <90mls/min/1.73m	90 Days Outcomes	Serum creatinine after 90 days	Calculated eGFR	eGFR grades	Urine proteins on dipstick
203	2020-10-22	70	Male	Muganda	Widower or Widow	Secondary	Catholic	Civil/NGO servant		No	No	Yes	Less than 2	No	No	Yes	No	No	No	No	No	None	No	No	No	Antihyperglycaemics	Negative					141/88	94	37	0	No	No	No	Negative	118	62	60-89	1+	Yes	Client Lost to follow up
99	2020-10-06	85	Female	Others	Widower or Widow	No Education	Moslem	Peasant Farmer		Yes	Yes	No		No	No	No	No	No	No	No	No	None	Yes	No	No		Negative					141/70	98	0	0	No	No	No	Negative	64	88	60-89	Negative	Yes	Client Lost to follow up
131	2020-10-13	59	Female	Banyakitara	Married	No Education	Born Again	Peasant Farmer		No	Yes	No		No	No	No	Yes	No	No	No	No	None	No	No	No	Anti hypertensives	Negative					135/71	64	35	0	No	No	No	Negative	102	60	60-89	Negative	Yes	Client Lost to follow up
258	2020-11-02	52	Female	Others	Widower or Widow	Primary	Protestant	Peasant Farmer		No	No	No		No	No	No	No	No	No	No	No	PUD	Yes	No	No		Negative					91/66	96	36	2	Yes	No	Yes	Negative	107	60	60-89	Negative	Yes	Client Lost to follow up
82	2020-10-01	79	Male	Muganda	Married	Tertiary	Catholic	Civil/NGO servant		No	No	Yes	Less than 2	No	No	No	No	No	No	Yes	No		Yes	No	No		Negative					108/65	56	37	0	No	No	No	Negative	113	61	60-89	Negative	Yes	Client Lost to follow up
150	2020-10-15	27	Female	Muganda	Married	Secondary	Catholic	Unemployed		Yes	Yes	No		No	No	No	No	No	No	No	No	None	Yes	No	No		Negative					121/85	94	36	0	No	No	No	Negative	93	84	60-89	1+	Yes	Client Lost to follow up
208	2020-10-22	42	Male	Banyakitara	Married	Primary	Moslem	Operate business		Yes	Yes	Yes	2 and above	Yes	No	No	Yes	No	No	No	No	None	No	No	No	Anti hypertensives	Negative					140/96	80	37	0	No	No	No	Negative	760	8	Less than 15	Negative	Yes	Client Lost to follow up
198	2020-10-21	40	Female	Others	Divorced or seperated	No Education	Catholic	Operate business		No	Yes	No		No	No	No	No	No	No	No	No	None	No	Yes	No		Negative					104/64	124	39	1	No	No	Yes	Negative	125	54	45-59	Negative	Yes	Client Lost to follow up
42	2020-09-23	44	Female	Banyakitara	Married	Primary	Catholic	Operate business		Yes	Yes	Yes	Less than 2	No	No	No	No	No	No	No	No	Known ISS	No	Yes	Yes		Positive	Yes	10 and over year	AZT/3TC/LPV/r		97/70	87	36	1	Yes	No	No	Positive	82	87	60-89	2+	Yes	Client alive	44	137	Above 90	Negative or trace
170	2020-10-19	49	Male	Muganda	Divorced or seperated	Primary	Catholic	Peasant Farmer		No	No	Yes	2 and above	No	No	No	Yes	No	No	No	No	None	No	No	No	Anti hypertensives,Septrin,ART	Positive	Yes	2 to <5 years	ABC/3TC/DTG	None	136/84	104	37	0	No	No	No	Positive	116	73	60-89	Negative	Yes	Client alive	113	76	60-89	Negative or trace
342	2020-11-17	35	Male	Others	Single	Primary	Catholic	Others	Boda boda Rider	No	Yes	No		No	No	No	No	No	No	No	No	Known ISS	No	No	No	Septrin	Positive	No		ART Naive		91/66	124	38	1	Yes	No	No	Positive	19	230	Above 90	Negative	No
239	2020-10-28	47	Male	Others	Divorced or seperated	Primary	Protestant	Operate business		Yes	Yes	Yes	Less than 2	Yes	No	No	No	No	No	No	No	Known ISS	Yes	No	No		Positive	Yes	2 to <5 years	TDF/3TC/DTG	None	158/56	124	39	0	No	No	No	Positive	106	83	60-89	Negative	Yes	Client died
370	2020-11-27	40	Female	Banyakitara	Divorced or seperated	Primary	Protestant	Operate business		Yes	Yes	Yes	2 and above	No	No	No	No	No	No	Yes	No	CKD	No	No	No	Amilodipine,Captopril	Negative					122/96	67	36	2	No	Yes	Yes	Negative	2629	1	Less than 15	2+	Yes	Client died
372	2020-11-27	80	Female	Others	Divorced or seperated	Primary	Moslem	Peasant Farmer		No	No	No		No	No	No	Yes	No	No	No	No	None	No	No	No	Antihypertensives	Negative					80/48	46	36	0	Yes	No	No	Negative	497	8	Less than 15	2+	Yes	Client died
123	2020-10-12	50	Female	Muganda	Married	Secondary	Moslem	Peasant Farmer		No	Yes	No		No	No	No	No	No	No	No	No	Asthma	No	No	No	Salbutamol	Negative					121/78	107	37	0	No	No	No	Negative	48	127	Above 90	Negative	No
124	2020-10-12	66	Female	Muganda	Widower or Widow	No Education	Catholic	Peasant Farmer		No	Yes	Yes	2 and above	No	No	No	No	No	No	No	No	None	Yes	No	No	None	Negative					119/67	107	36	0	No	No	No	Negative	59	106	Above 90	Negative	No
125	2020-10-12	40	Female	Muganda	Married	Secondary	Moslem	Operate business		No	Yes	No		No	No	No	No	No	No	No	No	None	Yes	No	No	None	Negative					145/93	116	38	1	No	Yes	No	Negative	35	152	Above 90	Negative	No
126	2020-10-12	30	Female	Muganda	Widower or Widow	Secondary	Catholic	Operate business		Yes	No	Yes	2 and above	No	No	No	Yes	No	No	No	No	None	No	No	No	Anti hypertensives	Negative					90/70	73	36	1	Yes	No	No	Negative	66	125	Above 90	Negative	No
127	2020-10-12	22	Female	Banyakitara	Divorced or seperated	Primary	Born Again	Unemployed		Yes	No	Yes	2 and above	No	No	No	No	No	No	No	No	Known ISS	No	No	No	Septrin	Positive	Yes	<1 year	TDF/3TC/EFV		94/72	137	37	1	Yes	No	No	Positive	8	279	Above 90	Negative	No
129	2020-10-12	52	Female	Banyakitara	Married	Primary	Protestant	Peasant Farmer		No	Yes	Yes	2 and above	No	No	No	No	No	No	No	No	None	No	No	Yes		Negative					113/63	76	37	99	No	No	No	Negative	49	125	Above 90	Negative	No
130	2020-10-12	67	Female	Others	Widower or Widow	Primary	Catholic	Operate business		Yes	Yes	Yes	2 and above	No	No	No	No	No	No	No	No	None	Yes	No	No		Negative					158/84	70	36	0	No	No	No	Negative	68	93	Above 90	Negative	No
132	2020-10-13	28	Female	Muganda	Single	Secondary	Catholic	Others	Fish Monger	Yes	Yes	No		No	No	No	No	No	No	No	No	Known ISS	No	No	No	ART,Septrin	Positive	Yes	<1 year	ABC/3TC/DTG	None	94/56	104	37	1	Yes	No	No	Positive	28	177	Above 90	Negative	No
133	2020-10-13	42	Female	Others	Married	Primary	Catholic	Peasant Farmer		No	Yes	No		No	No	No	No	Yes	No	No	No		Yes	No	No		Negative					136/75	98	360	0	No	No	No	Negative	65	121	Above 90	Negative	No
134	2020-10-13	27	Female	Muganda	Single	Primary	Catholic	Unemployed		Yes	No	No		No	No	No	No	No	No	No	No	None	Yes	No	No	None	Negative					68/54	104	37	1	Yes	No	No	Negative	63	135	Above 90	Negative	No
135	2020-10-13	19	Male	Muganda	Single	Primary	Catholic	Unemployed		No	Yes	No		No	No	No	No	No	No	No	No	Sickle cell disease	No	No	Yes	Folic Acid	Negative					94/55	73	36	1	Yes	No	No	Negative	14	290	Above 90	Negative	No
137	2020-10-13	47	Male	Muganda	Married	Primary	Catholic	Peasant Farmer		No	Yes	Yes	2 and above	No	No	No	No	No	No	No	No	None	Yes	No	No		Negative					116/81	56	35	0	No	No	No	Negative	60	132	Above 90	Negative	No
138	2020-10-16	81	Male	Muganda	Married	Primary	Catholic	Peasant Farmer		No	No	Yes	2 and above	No	No	No	Yes	Yes	No	No	No	None	No	No	No	Ant hypertensives	Negative					113/69	71	36	0	No	No	No	Negative	15	184	Above 90	Negative	No
139	2020-10-13	18	Male	Muganda	Single	Primary	Catholic	Unemployed		Yes	Yes	No		No	No	No	No	No	No	No	No	Known ISS	No	No	No	ART,Septrin	Positive	Yes	<1 year	TDF/3TC/DTG		110/63	82	37	0	No	No	No	Positive	33	207	Above 90	Negative	No
140	2020-10-14	29	Male	Muganda	Married	Secondary	Catholic	Civil/NGO servant		No	Yes	No		No	Yes	No	No	No	No	No	No	None	Yes	No	No		Negative					125	61	36	0	No	No	No	Negative	66	144	Above 90	Negative	No
142	2020-10-14	28	Male	Muganda	Married	Primary	Catholic	Others	Boda boda Rider	No	No	No		No	No	No	No	No	No	No	No	Known ISS	No	No	No	ART	Positive	Yes	2 to <5 years	TDF/3TC/DTG		100/64	101	35	0	No	No	No	Positive	103	98	Above 90	Negative	No
143	2020-10-14	35	Female	Muganda	Married	Tertiary	Catholic	Civil/NGO servant		No	Yes	No		No	Yes	No	No	No	No	No	No	None	No	No	No	Septrin	Positive	No		ART Naive		86/58	67	35	2	Yes	Yes	No	Positive	34	181	Above 90	1+	No	Client alive	70	119	Above 90	Negative
144	2020-10-14	63	Male	Muganda	Divorced or seperated	Primary	Catholic	Others	Fish Monger	No	Yes	Yes	2 and above	Yes	No	No	No	No	No	No	No	None	Yes	No	No	None	Negative					128/86	74	35	0	No	No	No	Negative	50	127	Above 90	Negative	No
147	2020-10-14	18	Male	Others	Single	Primary	Catholic	Unemployed		No	Yes	No		No	No	No	No	No	No	No	No	None	Yes	No	No		Negative					100/70	78	37	0	No	No	No	Negative	12	313	Above 90	Trace	No
148	2020-10-15	56	Female	Muganda	Married	Primary	Catholic	Peasant Farmer		Yes	Yes	No		No	No	No	No	No	No	No	No	None	Yes	No	No		Negative					110/70	69	35	0	No	No	No	Negative	47	123	Above 90	Negative	No
149	2020-10-15	68	Female	Luo	Widower or Widow	Primary	Catholic	Peasant Farmer		No	Yes	No		No	No	No	No	No	No	No	No	None	Yes	No	No		Negative					111/56	116	37	1	No	No	Yes	Negative	58	105	Above 90	Negative	No
151	2020-10-15	24	Female	Muganda	Single	Primary	Protestant	Civil/NGO servant		Yes	No	No		No	No	No	No	No	No	No	No	None	Yes	No	No		Negative	No		Newly diagnosed		111/70	80	35	0	No	No	No	Positive	40	162	Above 90	Negative	No
152	2021-10-15	18	Female	Banyakitara	Single	Primary	Born Again	Unemployed		No	No	No		No	No	No	No	No	No	No	No	None	Yes	No	No		Negative					125/76	91	37	0	No	No	No	Negative	48	159	Above 90	Negative	No
154	2020-10-15	20	Female	Muganda	Single	Primary	Catholic	Unemployed		Yes	Yes	No		No	No	No	No	No	No	No	No	Epilepsy	No	No	Yes		Negative					99/67	66	36	2	Yes	Yes	No	Negative	30	183	Above 90	Negative	No
155	2020-10-15	36	Female	Muganda	Divorced or seperated	Primary	Protestant	Peasant Farmer		No	No	Yes	2 and above	No	No	No	No	No	No	No	No	Known ISS	No	No	No	ART, Septrin	Positive	Yes	2 to <5 years	TDF/3TC/DTG	None	109/69	75	36	0	No	No	No	Positive	64	124	Above 90	Negative	No
156	2020-10-15	36	Female	Banyakitara	Divorced or seperated	Secondary	Moslem	Peasant Farmer		No	No	Yes	2 and above	No	No	Yes	No	No	No	No	No	None	No	No	No	Insulin	Negative					109/73	89	36	0	No	No	No	Negative	33	159	Above 90	Negative	No
157	2020-10-15	40	Female	Muganda	Divorced or seperated	Secondary	Catholic	Operate business		No	Yes	No		No	No	No	No	No	No	No	No	None	Yes	No	No	None	Negative					146/90	82	37	0	No	No	No	Negative	62	137	Above 90	Negative	No
159	2020-10-15	66	Male	Muganda	Married	Primary	Catholic	Peasant Farmer		No	No	Yes	2 and above	Yes	No	No	No	No	No	No	No	None	Yes	No	No		Negative					123/69	91	36	0	No	No	No	Negative	42	132	Above 90	Negative	No
160	2020-10-15	19	Male	Muganda	Single	Primary	Catholic	Unemployed		No	Yes	No		No	No	No	No	No	No	No	No	None	Yes	No	No	None	Positive	No		ART Naive		122/71	82	37	0	No	No	No	Positive	40	190	Above 90	Negative	No
161	2020-10-16	30	Female	Banyakitara	Single	Primary	Born Again	Peasant Farmer		Yes	Yes	Yes	Less than 2	Yes	No	No	No	No	No	No	No	Known ISS	No	No	No	ART, Septrin	Positive	Yes	2 to <5 years	TDF/3TC/EFV		93/63	112	37	3	Yes	Yes	Yes	Positive	19	199	Above 90	Negative	No
163	2020-10-16	35	Female	Banyakitara	Married	Primary	Moslem	Peasant Farmer		No	No	No		No	No	No	No	No	No	No	No	None	Yes	No	No		Positive	No		ART Naive		105/65	80	37	0	No	No	No	Positive	42	148	Above 90	Negative	No
164	2020-10-16	30	Female	Others	Divorced or seperated	Secondary	Catholic	Unemployed		Yes	No	Yes	2 and above	Yes	No	No	No	No	No	No	No	Known ISS	No	No	No	ART, Septrin	Positive	Yes	<1 year	TDF/3TC/DTG		122/83	137	37	1	No	Yes	No	Positive	47	148	Above 90	Negative	No
165	2020-10-16	20	Female	Muganda	Single	Primary	Catholic	Unemployed		No	Yes	No		No	No	No	No	No	No	No	No	None	Yes	No	No	None	Positive	Yes		Newly diagnosed		92/40	108	38	3	Yes	Yes	Yes	Positive	34	176	Above 90	Negative	No
166	2020-10-16	52	Male	Muganda	Divorced or seperated	Tertiary	Catholic	Civil/NGO servant		Yes	Yes	Yes	Less than 2	Yes	No	No	No	No	No	No	No	None	Yes	No	No		Negative					99/66	98	37	1	Yes	No	No	Negative	43	146	Above 90	Negative	No
167	2020-10-16	41	Male	Muganda	Divorced or seperated	Tertiary	Catholic	Civil/NGO servant		Yes	Yes	No		No	No	No	No	No	No	No	No	Known ISS	No	No	No	ART,Septrin	Positive	No		ART Naive		105/68	66	37	0	No	No	No	Positive	91	104	Above 90	Trace	No
168	2020-10-19	46	Male	Others	Widower or Widow	No Education	Moslem	Operate business		No	No	Yes	2 and above	Yes	No	No	No	No	No	No	No	Known ISS	No	No	No	ART, Septrin	Positive	Yes	10 and over year	TDF/3TC/DTG		118/72	72	38	0	No	No	No	Positive	75	121	Above 90	Negative	No
169	2020-10-19	40	Male	Muganda	Divorced or seperated	Primary	Catholic	Operate business		No	No	Yes	Less than 2	No	No	No	No	No	No	No	No	None	Yes	No	No		Negative					102/82	94	37	1	No	Yes	No	Negative	23	205	Above 90	Negative	No
173	2020-10-19	80	Female	Others	Married	Primary	SDA	Peasant Farmer		Yes	Yes	No		No	No	No	No	No	No	No	No	None	No	No	Yes	None	Negative					138/80	70	35	0	No	No	No	Negative	49	102	Above 90	Negative	No
174	2020-10-20	19	Male	Muganda	Single	Primary	Catholic	Operate business		No	No	No		No	No	No	No	No	No	No	No	None	Yes	No	No		Negative					137/70	65	37	0	No	No	No	Negative	61	159	Above 90	Negative	No
175	2020-10-19	19	Male	Muganda	Single	Primary	Catholic	Civil/NGO servant		No	No	No		No	No	No	No	No	No	No	No	None	Yes	No	No	None	Negative					101/45	93	38	0	No	No	No	Negative	48	176	Above 90	Negative	No
177	2020-10-19	30	Male	Muganda	Married	Secondary	Catholic	Operate business		No	Yes	No		No	No	No	No	No	No	No	No	Known ISS	No	No	No	ARTand septrin	Positive	Yes	<1 year	TDF/3TC/DTG		102/60	104	39	0	No	No	No	Positive	91	113	Above 90	Negative	No
178	2020-10-19	42	Male	Others	Divorced or seperated	No Education	Moslem	Civil/NGO servant		No	Yes	Yes	Less than 2	Yes	No	No	No	No	No	No	No	None	Yes	No	No		Negative					86/43	124	37	1	Yes	No	No	Negative	66	131	Above 90	Negative	No
179	2020-10-19	33	Female	Muganda	Single	Primary	Catholic	Unemployed		No	Yes	No		No	No	No	No	No	No	No	No	None	No	No	No	Septrin	Positive	No		Newly diagnosed		94/67	138	37	2	Yes	No	Yes	Positive	28	171	Above 90	Negative	No
180	2020-10-19	58	Female	Others	Divorced or seperated	Primary	Catholic	Peasant Farmer		No	Yes	No		No	No	No	Yes	No	No	No	No	None	No	No	No	Anti hypertensives	Negative					234/122	122	37	0	No	No	No	Negative	47	121	Above 90	Negative	No
181	2020-10-20	45	Male	Others	Married	Primary	Catholic	Peasant Farmer		Yes	Yes	Yes	Less than 2	No	No	No	No	No	No	No	No	None	Yes	No	No		Positive	No		ART Naive		122/86	128	35	0	No	No	No	Positive	69	126	Above 90	Negative	No
182	2020-10-20	32	Male	Muganda	Divorced or seperated	Primary	Catholic	Others	Taxi Driver	No	Yes	Yes	Less than 2	No	No	No	No	No	No	No	No	None	Yes	No	No		Positive	No		ART Naive		122/86	99	36	0	No	No	No	Positive	77	132	Above 90	Negative	No
183	2020-10-20	30	Male	Muganda	Single	Secondary	Protestant	Operate business		No	No	Yes	2 and above	No	No	No	No	No	No	No	No	None	Yes	No	No		Positive	No		ART Naive		105/68	91	37	0	No	No	No	Positive	59	150	Above 90	Negative	No
184	2020-10-20	60	Female	Muganda	Widower or Widow	Primary	Protestant	Peasant Farmer		Yes	Yes	No		No	No	No	No	No	No	No	No	None	No	Yes	Yes		Negative					106/68	101	37	2	No	Yes	Yes	Negative	19	161	Above 90	Negative	No
186	2020-10-20	80	Female	Others	Widower or Widow	No Education	Moslem	Peasant Farmer		No	No	No		No	No	No	Yes	No	No	No	No	None	No	No	No	Anti hypertensives	Negative					98/63	75	36	1	Yes	No	No	Negative	38	111	Above 90	Negative	No
187	2020-10-20	37	Female	Banyakitara	Divorced or seperated	Primary	Moslem	Peasant Farmer		No	No	No		No	No	No	No	No	No	No	No	Known ISS	No	No	No	ART, Septrin	Positive	Yes	2 to <5 years	DTG/3TC/EFV		104/64	98	36	0	No	No	No	Positive	36	153	Above 90	Negative	No
188	2020-10-20	34	Female	Muganda	Widower or Widow	Primary	Catholic	Peasant Farmer		No	Yes	No		No	No	Yes	Yes	No	No	No	No	None	No	No	No	Antihypertensives	Negative					145/93	115	37	2	No	Yes	Yes	Negative	66	121	Above 90	Negative	No
189	2020-10-20	50	Female	Others	Married	Secondary	SDA	Peasant Farmer		No	No	No		No	No	No	No	No	No	No	No	None	Yes	No	No		Negative					148/94	86	36	0	No	No	No	Negative	39	136	Above 90	Negative	No
190	2020-10-21	65	Male	Muganda	Married	Secondary	Protestant	Peasant Farmer		No	No	No		No	No	No	No	No	No	No	No	Known ISS	No	No	No	ART,Septrin	Positive	Yes	10 and over year	DTG/3TC/EFV		149/87	66	36	0	No	No	No	Positive	51	124	Above 90	Negative	No
191	2020-10-21	50	Male	Banyakitara	Married	Primary	Protestant	Peasant Farmer		No	No	Yes	2 and above	No	No	No	No	No	No	No	No	None	Yes	No	No	None	Negative					122/71	71	37	0	No	No	No	Negative	83	109	Above 90	Negative	No
192	2020-10-21	36	Male	Muganda	Married	Primary	Catholic	Others	Builder	No	No	Yes	Less than 2	No	Yes	No	No	No	No	No	No	None	Yes	No	No		Positive	No		ART Naive		103/71	92	38	0	No	No	No	Positive	91	108	Above 90	Negative	No
193	2020-10-21	40	Male	Others	Divorced or seperated	Primary	Catholic	Peasant Farmer		No	No	Yes	2 and above	Yes	No	No	No	Yes	No	No	No	Known ISS	No	No	No	ART, Septrin	Positive	Yes	<1 year	TDF/3TC/DTG		101/73	103	37	0	No	No	No	Positive	70	130	Above 90	Negative	No
194	2020-10-21	59	Female	Others	Widower or Widow	No Education	Catholic	Peasant Farmer		No	Yes	No		Yes	No	No	No	No	No	No	No	None	No	No	No		Negative					128/54	82	36	0	No	No	No	Negative	13	184	Above 90	Negative	No
195	2020-10-21	18	Female	Muganda	Single	No Education	Moslem	Unemployed		No	No	No		No	No	No	No	No	No	No	No	None	Yes	No	No		Negative					121/69	80	36	0	No	No	No	Negative	52	155	Above 90	Negative	No
196	2020-10-21	49	Female	Muganda	Widower or Widow	Primary	Moslem	Peasant Farmer		No	No	No		No	No	Yes	Yes	No	No	No	No	None	Yes	No	No		Negative					158/100	85	35	0	No	No	No	Negative	66	109	Above 90	Negative	No
197	2020-10-21	19	Female	Muganda	Single	Secondary	Protestant	Operate business		No	Yes	No		No	No	No	No	No	No	No	No	Sickler	No	No	No	Folic Acid	Negative					114/70	108	38	1	No	No	Yes	Negative	13	243	Above 90	Negative	No
199	2020-10-21	56	Female	Others	Married	Primary	Moslem	Peasant Farmer		No	No	No		No	No	No	No	No	No	No	No	None	Yes	No	No	None	Negative					148/55	79	37	0	No	No	No	Negative	38	132	Above 90	Negative	No
202	2020-10-22	52	Male	Muganda	Divorced or seperated	Primary	Catholic	Peasant Farmer		No	Yes	Yes	Less than 2	Yes	No	No	No	No	No	No	No	None	Yes	No	No		Negative					122/91	142	38	1	No	Yes	No	Negative	53	134	Above 90	Negative	No
204	2020-10-22	62	Male	Muganda	Married	Secondary	Catholic	Peasant Farmer		No	Yes	Yes	2 and above	No	No	No	Yes	No	No	No	No	None	No	No	No	Anti hypertensives	Negative					122/80	79	37	0	No	No	No	Negative	52	126	Above 90	Negative	No
205	2020-10-22	30	Male	Muganda	Single	Primary	Catholic	Peasant Farmer		No	No	No		No	No	No	No	No	No	No	No	None	Yes	No	No		Negative					102/77	82	36	0	No	No	No	Negative	44	169	Above 90	Negative	No
206	2020-10-22	28	Male	Muganda	Married	Primary	Moslem	Others	Bodaboda Rider	Yes	Yes	No		No	No	No	No	No	No	No	No	None	Yes	No	No		Positive	No		ART Naive		133/92	86	38	0	No	No	No	Positive	84	126	Above 90	Negative	No
207	2020-10-22	83	Male	Muganda	Married	Primary	Catholic	Peasant Farmer		No	No	Yes	Less than 2	No	No	No	No	No	No	No	No	None	Yes	No	No	None	Negative					75/42	78	37	1	Yes	No	No	Negative	45	115	Above 90	Negative	No
209	2020-10-22	84	Female	Muganda	Widower or Widow	Primary	Catholic	Peasant Farmer		No	No	No		No	No	Yes	Yes	No	No	No	No	None	No	No	No		Negative					176/90	106	36	1	No	Yes	No	Negative	8	181	Above 90	Negative	No
210	2020-10-22	53	Female	Muganda	Married	Primary	Protestant	Peasant Farmer		No	Yes	No		No	No	No	Yes	No	No	No	No	None	No	Yes	No		Negative					117/73	96	36	1	No	No	Yes	Negative	30	145	Above 90	Negative	No
212	2020-10-23	19	Female	Muganda	Single	Secondary	Catholic	Unemployed		No	Yes	No		No	No	No	No	No	No	No	No	None	No	Yes	No		Negative					120/70	96	36	0	No	No	No	Negative	39	169	Above 90	Negative	No
213	2020-10-23	57	Female	Others	Widower or Widow	No Education	Catholic	Unemployed		No	Yes	No		No	No	No	No	No	No	No	No	PUD	No	No	No	None	Negative					162/92	85	36	1	No	No	Yes	Negative	36	146	Above 90	Negative	No
216	2020-10-26	43	Male	Muganda	Divorced or seperated	Primary	Catholic	Others	Builder	Yes	Yes	Yes	Less than 2	Yes	No	No	No	No	No	No	No	Known ISS	No	No	No	ART, Septrin,Isoniazid	Positive	Yes	<1 year	TDF/3TC/DTG		106/80	120	37	0	No	No	No	Positive	90	104	Above 90	Trace	No
218	2020-10-26	35	Male	Others	Married	Primary	Born Again	Peasant Farmer		No	Yes	Yes	2 and above	No	Yes	No	No	No	No	No	No	None	Yes	No	No		Negative					106/75	98	36	0	No	No	No	Negative	61	145	Above 90	Negative	No
219	2020-10-26	34	Male	Muganda	Single	Primary	Catholic	Others	Builder	Yes	No	Yes	2 and above	No	No	No	No	No	No	No	No	Known ISS	No	No	No	ART ,Septrin	Positive	Yes	2 to <5 years	TDF/3TC/DTG		119/79	91	37	0	No	No	No	Positive	64	141	Above 90	Negative	No
220	2020-10-26	40	Male	Muganda	Married	Secondary	Moslem	Peasant Farmer		No	Yes	No		No	Yes	No	No	No	No	No	No	None	Yes	No	No		Negative					114/73	79	37	0	No	No	No	Negative	86	112	Above 90	Negative	No
221	2020-10-26	29	Male	Others	Divorced or seperated	Primary	Catholic	Peasant Farmer		Yes	No	Yes	2 and above	No	No	No	No	No	No	No	No	None	Yes	No	No		Negative					130/101	124	37	0	No	No	No	Negative	50	161	Above 90	Negative	No
222	2020-10-26	68	Male	Muganda	Married	Primary	Moslem	Peasant Farmer		No	No	No		No	No	No	Yes	No	No	No	No	None	No	No	No	Antihypertensives	Negative					137/75	94	36	0	No	No	No	Negative	66	109	Above 90	Negative	No
224	2020-10-26	20	Male	Muganda	Single	Primary	Moslem	Operate business		No	No	No		No	No	No	No	No	No	No	No	None	Yes	No	No		Negative					127/78	80	37	0	No	No	No	Negative	55	165	Above 90	Negative	No
227	2020-10-27	70	Female	Banyakitara	Widower or Widow	No Education	Catholic	Peasant Farmer		No	No	No		No	No	No	No	No	No	No	No	None	Yes	No	No		Negative					101/72	76	36	0	No	No	No	Negative	56	105	Above 90	Negative	No
229	2020-11-10	45	Male	Muganda	Married	Primary	Moslem	Operate business		No	No	No		Yes		No	No	No	No	No	No	Known ISS	No	No	No	ART ,Septrin	Positive	Yes	<1 year	TDF/3TC/DTG		140/103	94	37	0	No	No	No	Positive	94	97	Above 90	Negative	No
280	2020-11-04	80	Female	Muganda	Widower or Widow	No Education	Catholic	Peasant Farmer		Yes	No	Yes	2 and above	Yes	No	No	No	No	No	No	No	None	Yes	No	No		Negative					229	106	37	1	No	Yes	No	Negative	62	95	Above 90	Negative	No
281	2020-11-05	77	Male	Banyakitara	Married	No Education	Protestant	Peasant Farmer		Yes	Yes	Yes	2 and above	Yes	No	No	No	No	No	No	No	None	Yes	No	No		Negative					124/55	85	36	0	No	No	No	Negative	52	112	Above 90	Negative	No
282	2020-11-05	29	Male	Muganda	Married	Primary	Born Again	Peasant Farmer		Yes	Yes	No		No	No	No	No	No	No	No	No	Known ISS	No	No	No	ART	Positive	Yes	2 to <5 years	ABC/3TC/DTG		113/70	105	37	0	No	No	No	Positive	48	164	Above 90	Negative	No
284	2020-11-05	21	Male	Others	Single	Primary	SDA	Peasant Farmer		No	No	No		No	No	No	No	No	No	No	No	None	Yes	No	No		Negative					128/72	89	37	0	No	No	No	Negative	95	114	Above 90	Negative	No
288	2020-11-05	38	Male	Banyakitara	Married	Primary	Moslem	Peasant Farmer		No	No	No		No	No	Yes	No	No	No	No	No	None	No	No	No	Antihyperglycaemics	Negative					120/79	82	35	0	No	No	No	Negative	74	129	Above 90	Negative	No
289	2020-11-05	60	Male	Muganda	Married	Primary	Moslem	Peasant Farmer		No	No	No		Yes	No	No	No	No	No	No	No	None	Yes	No	No	None	Negative					116/75	83	36	0	No	No	No	Negative	61	120	Above 90	Negative	No
290	2020-09-05	68	Female	Muganda	Divorced or seperated	No Education	Catholic	Peasant Farmer		No	Yes	No		No	Yes	No	No	No	No	No	No	PUD	No	Yes	Yes		Negative					157/63	94	38	1	No	No	Yes	Negative	44	115	Above 90	Negative	No
291	2020-11-06	36	Male	Muganda	Single	Primary	Protestant	Peasant Farmer		Yes	Yes	Yes	2 and above	No	No	No	No	No	No	No	No	None	Yes	No	No		Negative					101/56	87	36	0	No	No	No	Negative	43	135	Above 90	Negative	No
293	2020-11-06	63	Male	Muganda	Married	Primary	Catholic	Peasant Farmer		No	Yes	Yes	2 and above	No	No	No	No	No	No	No	No	None	Yes	No	No		Negative					164/97	104	36	0	No	No	No	Negative	80	104	Above 90	Negative	No
295	2020-11-06	33	Female	Muganda	Divorced or seperated	No Education	Born Again	Operate business		Yes	Yes	No		No	No	No	Yes	No	Yes	No	No	None	No	No	No	Morphine	Negative					118/70	70	35	1	No	No	Yes	Negative	67	120	Above 90	Negative	No
297	2020-11-06	51	Female	Muganda	Married	Primary	Moslem	Peasant Farmer		Yes	Yes	No		No	No	No	No	No	Yes	No	No	None	No	Yes	Yes	None	Negative					160/80	96	37	1	No	No	Yes	Negative	36	139	Above 90	Negative	No
299	2020-11-06	62	Female	Muganda	Widower or Widow	Secondary	Catholic	Peasant Farmer		No	No	No		No	No	No	No	No	No	No	No	None	No	Yes	Yes		Negative					116/80	107	37	0	No	No	No	Negative	28	140	Above 90	Negative	No
298	2020-11-09	36	Male	Others	Widower or Widow	Primary	SDA	Operate business		No	Yes	Yes	2 and above	No	No	No	No	No	No	No	No	None	Yes	No	No		Positive	No		ART Naive		82/56	116	37	1	Yes	No	No	Positive	86	116	Above 90	Negative	No
300	2020-11-09	18	Male	Muganda	Single	Secondary	Catholic	Unemployed		No	No	No		No	No	Yes	No	No	No	No	No	None	No	No	No	Insulin	Negative					113/52	77	36	0	No	No	No	Negative	53	170	Above 90	Negative	No
301	2020-11-09	35	Male	Muganda	Married	Primary	Moslem	Operate business		No	No	No		No	Yes	No	No	No	No	No	No	Known ISS	No	No	No	ART , Septrin	Positive	Yes	5 to 10 years	TDF/3TC/DTG	Not sure	137/99	69	36	0	No	No	No	Positive	65	139	Above 90	Negative	No
304	2020-11-10	18	Male	Muganda	Single	Primary	Moslem	Operate business		No	Yes	No		No	No	No	No	No	No	No	No	None	Yes	No	No		Negative					98/57	107	36	1	Yes	No	No	Negative	92	121	Above 90	Trace	No
305	2020-11-10	56	Male	Muganda	Divorced or seperated	No Education	Catholic	Peasant Farmer		No	No	Yes	Less than 2	No	No	No	No	No	No	No	No	Known ISS	No	No	No	ART, Septrin	Positive	Yes	<1 year	TDF/3TC/DTG	None	115/77	120	37	0	No	No	No	Positive	61	123	Above 90	Negative	No
306	2020-11-10	40	Female	Muganda	Married	Primary	Moslem	Operate business		Yes	No	No		No	No	Yes	No	No	No	No	No	None	No	No	No	Anti hyperglycaemics	Negative					130/93	72	36	0	No	No	No	Negative	39	146	Above 90	Negative	No
308	2020-11-10	21	Female	Muganda	Single	Primary	Catholic	Unemployed		No	No	No		No	No	No	No	No	No	No	No	None	Yes	No	No		Negative					135/68	101	37	0	No	No	No	Negative	16	224	Above 90	Negative	No
310	2020-11-12	35	Female	Banyakitara	Married	No Education	Moslem	Operate business		No	No	No		No	No	No	No	No	No	No	No	Known ISS	No	No	No	ART,Septrin	Positive	Yes	<1 year	TDF/3TC/DTG		99/60	109	37	1	Yes	No	No	Positive	62	130	Above 90	Negative	No
311	2020-11-11	38	Female	Muganda	Married	Tertiary	Catholic	Civil/NGO servant		No	No	No		No	No	No	No	No	No	No	No	known ISS	No	No	No	ART, Septrin	Positive	Yes	5 to 10 years	TDF/3TC/DTG	TDF/3TC/EFV	136/80	78	37	0	No	No	No	Positive	77	98	Above 90	Negative	No
312	2020-11-11	40	Female	Banyakitara	Married	Primary	Moslem	Peasant Farmer		No	Yes	No		No	No	No	No	No	No	No	No	None	Yes	No	No		Positive	No		Newly diagnosed		135/91	116	36	0	No	No	No	Positive	47	148	Above 90	Negative	No
313	2020-11-12	62	Female	Others	Divorced or seperated	No Education	Catholic	Operate business		No	Yes	Yes	Less than 2	Yes	No	No	No	No	No	No	No	None	Yes	No	No		Negative					127/81	110	37	0	No	No	No	Negative	35	130	Above 90	Trace	No
314	2020-11-12	18	Female	Muganda	Single	Tertiary	Protestant	Unemployed		No	No	No		No	No	No	No	No	No	No	No	none	Yes	No	No		Negative					102/59	73	37	0	No	No	No	Negative	51	156	Above 90	Negative	No
315	2020-11-12	27	Female	Banyakitara	Married	Primary	Born Again	Unemployed		No	Yes	No		No	No	No	No	No	No	No	No	Known ISS	No	No	No	ART, Septrin	Positive	Yes	10 and over year	TDF/3TC/DTG	TDF/3TC/EFV	137/91	92	37	0	No	No	No	Positive	54	144	Above 90	Negative	No
316	2020-11-12	23	Female	Others	Single	Secondary	Born Again	Unemployed		Yes	Yes	No		No	No	No	No	No	No	No	No	Epilepsy	No	No	No	Anti Epileptics	Negative					125/81	116	37	0	No	No	No	Negative	35	171	Above 90	Negative	No
320	2020-11-12	59	Male	Muganda	Married	Primary	Catholic	Peasant Farmer		Yes	Yes	No		No	No	No	No	No	No	No	No	None	Yes	No	No		Negative					81/45	83	36	1	Yes	No	No	Negative	43	139	Above 90	Negative	No
321	2020-11-13	64	Male	Banyakitara	Divorced or seperated	Secondary	Moslem	Civil/NGO servant		No	Yes	Yes	2 and above	Yes	No	No	No	No	No	No	No	None	Yes	No	No		Negative					142/91	94	37	0	No	No	No	Negative	78	105	Above 90	Negative	No
323	2020-11-13	30	Male	Muganda	Single	Primary	Catholic	Peasant Farmer		No	Yes	No		No	No	No	No	No	No	No	No	None	Yes	No	No		Negative					106/54	104	37	0	No	No	No	Negative	43	170	Above 90	Negative	No
324	2020-11-13	48	Male	Muganda	Divorced or seperated	Tertiary	Catholic	Civil/NGO servant		No	No	Yes	Less than 2	No	No	No	No	No	No	No	No	Known ISS	No	No	No	ART	Positive	Yes	2 to <5 years	TDF/3TC/DTG	None	100/81	91	37	0	No	No	No	Positive	80	116	Above 90	Negative	No
325	2020-11-09	39	Male	Others	Divorced or seperated	Primary	Catholic	Others	Fish Monger	Yes	No	Yes	Less than 2	Yes	No	No	No	No	No	No	No	Known ISS	No	No	No	Septrin	Positive	No		Newly diagnosed		108/70	116	36	0	No	No	No	Positive	79	125	Above 90	Negative	No
328	2020-11-16	48	Female	Muganda	Widower or Widow	Secondary	Protestant	Operate business		Yes	No	No		No	No	No	No	No	No	No	No	None	No	No	Yes		Negative					139/86	87	37	2	No	Yes	Yes	Negative	28	154	Above 90	Negative	No
329	2020-11-16	33	Female	Muganda	Married	Secondary	Catholic	Peasant Farmer		No	No	No		No	No	No	No	No	No	No	No	None	No	Yes	No		Negative					120/81	833	7	0	No	No	No	Negative	38	155	Above 90	Negative	No
331	2020-11-16	65	Female	Muganda	Divorced or seperated	Secondary	Catholic	Peasant Farmer		No	Yes	No		No	No	No	No	No	No	No	No	None	No	Yes	No		Negative					114/69	120	36	1	No	No	Yes	Negative	27	138	Above 90	Negative	No
330	2020-11-16	46	Female	Muganda	Married	Primary	Born Again	Others	Pastor	No	Yes	No		No	No	No	Yes	No	No	No	No	None	No	No	Yes		Negative					115/75	77	36	0	No	No	No	Negative	64	116	Above 90	Negative	No
333	2020-11-16	39	Female	Muganda	Married	Tertiary	Moslem	Operate business		Yes	Yes	No		No	No	No	Yes	No	No	No	No	None	No	Yes	Yes		Negative					145/93	85	36	1	No	No	Yes	Negative	49	137	Above 90	Negative	No
334	2020-11-16	75	Female	Banyakitara	Widower or Widow	No Education	Born Again	Peasant Farmer		No	Yes	No		No	No	No	No	No	No	No	No	None	No	Yes	No	None	Negative					79/55	101	37	2	Yes	No	Yes	Negative	60	99	Above 90	Negative	No
335	2020-11-16	48	Male	Muganda	Married	Secondary	Protestant	Others	Builder	No	No	Yes	Less than 2	No	No	No	No	No	No	No	No	None	Yes	No	No	None	Negative					104/73	83	37	0	No	No	No	Negative	34	165	Above 90	Negative	No
336	2020-11-16	33	Male	Muganda	Married	Primary	Catholic	Others	Taxi Driver	No	No	Yes	2 and above	No	No	No	No	No	No	No	No	None	Yes	No	No	None	Negative					107/76	65	36	0	No	No	No	Negative	56	150	Above 90	Negative	No
337	2020-11-16	35	Male	Muganda	Divorced or seperated	Primary	Catholic	Peasant Farmer		No	No	Yes	2 and above	No	No	No	No	No	No	No	No	Known ISS	No	No	No	ART, Septrin	Positive	Yes	2 to <5 years	TDF/3TC/DTG	TDF/3TC/EFV	125/88	103	36	0	No	No	No	Positive	59	145	Above 90	Negative	No
340	2020-11-16	81	Female	Muganda	Widower or Widow	Primary	Moslem	Peasant Farmer		No	Yes	No		No	No	Yes	Yes	No	No	No	No	None	No	Yes	Yes	None	Negative					120/67	96	37	0	No	No	No	Negative	41	108	Above 90	Negative	No
341	2020-11-17	54	Male	Muganda	Divorced or seperated	Primary	Catholic	Peasant Farmer		No	Yes	No		No	No	No	No	No	No	No	No	None	Yes	No	No	None	Negative					109/77	96	37	0	No	No	No	Negative	54	131	Above 90	Negative	No
343	2020-11-17	35	Male	Muganda	Married	Primary	Catholic	Others	Mechanic	No	Yes	Yes	2 and above	Yes	No	No	No	No	No	No	No	Known ISS	No	No	No	ART, Septrin	Positive	Yes	<1 year	TDF/3TC/DTG	None	85/53	48	37	1	Yes	No	No	Positive	52	152	Above 90	Negative	No
344	2020-11-17	26	Male	Muganda	Single	Primary	Catholic	Peasant Farmer		No	Yes	No		No	No	No	No	No	No	No	No	None	No	No	No	None	Negative					101/71	123	38	0	No	No	No	Negative	40	181	Above 90	Negative	No
346	2020-11-18	32	Male	Muganda	Divorced or seperated	Primary	Catholic	Others	Boda Boda Rider	Yes	Yes	Yes	Less than 2	No	No	No	No	No	No	No	No	None	No	No	No	None	Negative					102/73	66	37	1	No	Yes	No	Negative	40	173	Above 90	Negative	No
347	2020-11-18	85	Female	Others	Widower or Widow	No Education	Catholic	Peasant Farmer		No	Yes	Yes	Less than 2	Yes	No	No	No	No	Yes	No	No	None	No	Yes	No	None	Negative					89/59	79	37	2	Yes	No	Yes	Negative	29	117	Above 90	Negative	No
348	2020-11-18	50	Female	Muganda	Married	Tertiary	Catholic	Civil/NGO servant		Yes	No	Yes	Less than 2	No	No	No	No	No	No	No	Yes		No	No	No	Morphine	Negative					125/79	132	37	0	No	No	No	Negative	41	134	Above 90	Trace	No
349	2020-11-18	64	Female	Muganda	Single	Tertiary	Catholic	Operate business		No	No	Yes	Less than 2	No	No	Yes	Yes	No	No	No	No	None	No	Yes	No	Anti hyperglycaemics and hypertensives	Negative					128/81	120	37	2	No	Yes	Yes	Negative	44	119	Above 90	Negative	No
351	2020-11-18	58	Female	Banyakitara	Widower or Widow	No Education	Catholic	Peasant Farmer		Yes	No	No		No	No	No	No	No	No	No	No	None	No	Yes	No	None	Negative					106/73	92	37	1	No	No	Yes	Negative	35	134	Above 90	Negative	No
355	2020-11-19	58	Female	Muganda	Widower or Widow	Primary	Catholic	Operate business		No	No	No		No	No	Yes	Yes	No	No	No	No	PUD	No	Yes	No	Anti hyperglycaemics,Anti Hypertensives	Negative					154/75	87	37	0	No	No	No	Negative	59	112	Above 90	Negative	No
357	2020-11-19	28	Male	Muganda	Married	Primary	Catholic	Peasant Farmer		No	Yes	Yes	Less than 2	No	No	No	No	No	No	No	No	None	Yes	No	No	None	Negative					120/68	105	38	0	No	No	No	Negative	60	151	Above 90	Trace	No
359	2020-11-19	24	Male	Muganda	Married	Primary	Catholic	Operate business		No	Yes	Yes	2 and above	Yes	No	No	No	No	No	No	No	Known ISS	No	No	No	ART , Septrin	Positive	Yes	<1 year	TDF/3TC/DTG		93/59	107	38	1	Yes	No	No	Positive	45	175	Above 90	Negative	No
363	2020-11-24	18	Female	Muganda	Single	Primary	Catholic	Unemployed		No	No	No		No	No	No	No	No	No	No	No	None	No	No	No	None	Negative					110/66	63	37	0	No	No	No	Negative	88	96	Above 90	Negative	No
366	2020-11-25	75	Male	Muganda	Married	Secondary	Moslem	Civil/NGO servant		No	Yes	No		No	Yes	No	No	No	No	No	No	None	Yes	No	No	None	Negative					134/95	82	37	0	No	No	No	Negative	64	106	Above 90	Negative	No
368	2020-11-28	88	Female	Muganda	Widower or Widow	Primary	Catholic	Peasant Farmer		No	No	Yes	Less than 2	No	No	No	Yes	No	No	No	No	None	No	No	Yes	None	Negative					228/110	81	36	0	No	No	No	Negative	43	101	Above 90	Negative	No
285	2020-11-11	18	Male	Others	Single	Primary	Protestant	Unemployed		No	No	No		No	No	No	No	No	No	No	No	None	Yes	No	No	None	Negative					128/78	101	36	0	No	No	No	Negative	45	163	Above 90	Negative	No
252	2020-11-18	20	Male	Others	Single	Primary	Protestant	Others	Builder	No	No	Yes	2 and above	No	No	No	No	No	No	No	No	None	Yes	No	No	None	Negative					125/96	66	37	1	No	Yes	No	Negative	44	181	Above 90	Negative	No
60	2020-09-29	45	Male	Muganda	Married	Primary	Protestant	Operate business		Yes	No	Yes	Less than 2	No	No	No	No	No	No	No	No	None	Yes	No	No	None	Negative					95/67	98	37	1	Yes	No	No	Negative	50	144	Above 90	Negative	No
61	2020-09-28	49	Male	Muganda	Widower or Widow	Secondary	Born Again	Operate business		Yes	No	Yes	Less than 2	Yes	No	No	No	No	No	No	No	None	Yes	No	No	None	Negative					143/78	132	37	0	No	No	No	Negative	52	138	Above 90	Negative	No
64	2020-09-28	20	Female	Muganda	Widower or Widow	Primary	Catholic	Unemployed		Yes	Yes	Yes	Less than 2	No	No	No	No	No	No	No	No	None	Yes	No	No	None	Positive	No		ART Naive		120/90	90	36	0	No	No	No	Positive	44	162	Above 90	Negative	No
65	2020-09-28	63	Female	Muganda	Divorced or seperated	No Education	Moslem	Peasant Farmer		No	Yes	Yes	Less than 2	No	No	No	No	No	No	No	No	None	Yes	No	No	None	Positive	Yes	<1 year	TDF/3TC/DTG	TDF/3TC/EFV	142/63	101	36	0	No	No	No	Positive	61	107	Above 90	Negative	No
68	2021-09-29	18	Male	Muganda	Single	Primary	Catholic	Unemployed		Yes	Yes	No		No	No	No	No	No	No	No	No	None	No	Yes	No	Paracetamol	Negative					127/56	103	39	1	No	No	Yes	Negative	94	118	Above 90	Negative	No
69	2020-09-29	60	Male	Muganda	Married	Primary	Moslem	Peasant Farmer		No	Yes	No		No	No	No	No	No	No	No	No	None	Yes	No	No	None	Negative					125/83	128	36	0	No	No	No	Negative	81	105	Above 90	Negative	No
70	2020-09-29	33	Male	Muganda	Single	Primary	Catholic	Operate business		Yes	Yes	Yes	Less than 2	Yes	No	No	No	No	No	No	No	None	Yes	No	No	None	Positive	No		ART Naive		103/55	92	37	0	No	No	No	Positive	37	178	Above 90	Negative	No
71	2020-09-29	34	Male	Banyakitara	Married	Primary	Moslem	Operate business		Yes	No	Yes	Less than 2	No	No	No	No	No	No	No	No	None	Yes	No	No	None	Negative					105/75	116	38	0	No	No	No	Negative	78	130	Above 90	Negative	No
72	2020-09-30	19	Female	Muganda	Single	Secondary	Born Again	Unemployed		No	No	No		No	No	No	No	No	No	No	No	Known ISS	No	No	No	ART,Septrin	Positive	Yes	10 and over year	AZT/3TC/ATV/r	None	121/73	87	36	0	No	No	No	Positive	51	155	Above 90	Negative	No
73	2020-09-30	28	Female	Others	Married	Primary	Catholic	Unemployed		No	Yes	No		No	No	No	No	No	No	No	No	None	No	No	No	Septrin	Positive	No		ART Naive		104/64	124	37	1	No	No	Yes	Positive	48	149	Above 90	Negative	No
74	2020-09-30	70	Female	Others	Widower or Widow	Primary	Protestant	Peasant Farmer		No	Yes	No		No	No	No	No	No	No	No	No	None	Yes	No	No	None	Negative					88/71	119	35	2	Yes	No	Yes	Negative	34	124	Above 90	Negative	No
77	2020-09-30	57	Male	Banyakitara	Divorced or seperated	Primary	Protestant	Peasant Farmer		No	Yes	Yes	2 and above	Yes	No	No	No	No	No	No	No	None	Yes	No	No	None	Negative					108/90	128	36	0	No	No	No	Negative	66	118	Above 90	Negative	No
78	2020-10-02	94	Female	Muganda	Widower or Widow	No Education	Protestant	Peasant Farmer		No	No	Yes	Less than 2	No	No	Yes	Yes	No	No	No	No	None	No	No	No	Anti hypertensive and Hyperglycaemics	Negative					113/50	73	36	0	No	No	No	Negative	51	92	Above 90	Negative	No
79	2020-10-05	64	Male	Muganda	Married	Tertiary	Moslem	Civil/NGO servant		No	No	No		Yes	No	No	No	No	No	No	No	None	Yes	No	No	None	Negative					123/70	96	35	0	No	No	No	Negative	73	108	Above 90	Negative	No
80	2020-10-01	20	Male	Muganda	Married	Primary	Moslem	Operate business		No	No	No		No	Yes	No	No	No	No	No	No	None	Yes	No	No	None	Negative					120/65	69	36	0	No	No	No	Negative	61	158	Above 90	Negative	No
83	2020-10-02	50	Female	Muganda	Widower or Widow	Secondary	Catholic	Operate business		Yes	No	No		No	No	No	No	No	No	No	No	Known ISS	No	No	No	ART,Septrin	Positive	Yes	2 to <5 years	TDF/3TC/DTG		124/82	124	37	0	No	No	No	Positive	57	120	Above 90	Negative	No
86	2020-10-01	80	Female	Banyakitara	Widower or Widow	No Education	Born Again	Peasant Farmer		No	Yes	No		No	No	No	Yes	No	No	No	No	None	No	No	No	Anti hypertensives	Negative					149/71	71	38	0	No	No	No	Negative	46	105	Above 90	Negative	No
84	2020-10-01	42	Male	Muganda	Widower or Widow	Primary	Catholic	Peasant Farmer		Yes	Yes	Yes	Less than 2	Yes	No	No	No	No	No	No	No	None	Yes	No	No	None	Negative					104/69	96	38	0	No	No	No	Negative	41	160	Above 90	Negative	No
87	2020-10-05	72	Male	Muganda	Divorced or seperated	No Education	Moslem	Peasant Farmer		Yes	Yes	No		No	No	Yes	No	No	No	No	No	None	No	No	No	Insulin	Negative					121/73	77	35	0	No	No	No	Negative	47	122	Above 90	Negative	No
88	2020-10-05	30	Male	Others	Divorced or seperated	Primary	Catholic	Operate business		Yes	Yes	No		No	No	No	No	No	No	No	No	None	Yes	No	No	None	Positive	No		ART Naive		141/97	69	37	0	No	No	No	Positive	97	104	Above 90	Negative	No
89	2020-10-02	63	Female	Others	Widower or Widow	No Education	Moslem	Peasant Farmer		No	Yes	No		No	No	No	Yes	No	No	No	No	None	No	No	No	Anti hypertensives	Negative					122/71	82	37	0	No	No	No	Negative	45	119	Above 90	Negative	No
90	2020-10-05	19	Male	Muganda	Single	Primary	Protestant	Unemployed		Yes	Yes	No		No	No	No	No	No	No	No	No	Sickle cell	No	No	No	Fansidar,Folic Acid	Negative					101/59	71	37	0	No	No	No	Negative	42	186	Above 90	Negative	No
97	2020-10-06	80	Female	Banyakitara	Widower or Widow	No Education	Protestant	Peasant Farmer		No	No	Yes	2 and above	No	No	Yes	No	No	No	No	No	None	No	No	No	Anti hyperglycaemics	Negative					101/66	84	36	0	No	No	No	Negative	42	108	Above 90	Negative	No
98	2020-10-06	50	Female	Muganda	Widower or Widow	No Education	Catholic	Peasant Farmer		No	No	No		No	No	No	Yes	No	No	No	No	None	No	No	No	Anti hypertensive	Negative					136/67	64	37	1	No	Yes	No	Negative	76	91	Above 90	Negative	No
101	2020-10-07	73	Female	Muganda	Widower or Widow	Primary	Catholic	Peasant Farmer		Yes	Yes	No		No	No	No	Yes	No	No	No	No	None	No	No	No	Antihypertensives	Negative					138/75	105	36	0	No	No	No	Negative	53	105	Above 90	Trace	No
102	2020-10-07	84	Female	Muganda	Widower or Widow	Primary	Catholic	Peasant Farmer		No	Yes	No		No	No	No	Yes	No	No	No	No	None	No	No	No	Anti hypertensives	Negative					154/72	61	37	1	No	Yes	No	Negative	51	98	Above 90	Negative	No
103	2020-10-07	25	Female	Muganda	Married	Primary	Moslem	Unemployed		No	Yes	No		No	No	No	No	No	No	No	No	Newly diagnosed ISS	No	No	No	Septrin	Positive	No		ART Naive		86/64	164	38	1	Yes	No	No	Positive	50	150	Above 90	Negative	No
104	2020-10-07	32	Female	Muganda	Single	Tertiary	Moslem	Operate business		No	No	No		No	No	No	No	No	No	No	No	Known ISS	No	No	No	ART, Septrin	Positive	Yes	5 to 10 years	TDF/3TC/EFV		64/41	62	38	1	Yes	No	No	Positive	67	121	Above 90	Negative	No
107	2020-10-07	19	Female	Others	Married	Tertiary	Moslem	Operate business		No	Yes	No		No	No	No	No	No	No	No	No	None	Yes	No	No	None	Negative					118/57	74	37	0	No	No	No	Negative	52	154	Above 90	Negative	No
109	2020-10-07	22	Male	Banyakitara	Married	No Education	Moslem	Others	Fish Monger	Yes	No	No		No	No	No	No	No	No	No	No	None	Yes	No	No	None	Negative					126/74	92	37	0	No	No	No	Negative	54	164	Above 90	Negative	No
110	2020-10-07	56	Male	Muganda	Married	Secondary	Catholic	Others	Carpenter	No	No	Yes	Less than 2	No	No	No	No	No	No	No	No	None	Yes	No	No	None	Negative					91/62	107	37	1	Yes	No	No	Negative	83	105	Above 90	Negative	No
112	2020-10-07	43	Male	Muganda	Married	Primary	Catholic	Others	Tailor	No	Yes	Yes	Less than 2	Yes	No	No	No	No	No	No	No	None	Yes	No	No	None	Negative					123/67	71	36	0	No	No	No	Negative	35	169	Above 90	Negative	No
113	2020-10-12	56	Female	Muganda	Widower or Widow	Primary	Protestant	Peasant Farmer		Yes	Yes	No		No	No	No	No	No	No	No	No	None	Yes	No	No	None	Negative					143/68	86	36	0	No	No	No	Negative	56	116	Above 90	Negative	No
114	2020-10-08	18	Male	Banyakitara	Single	Primary	Born Again	Unemployed		No	No	Yes	2 and above	No	No	No	No	No	No	No	No	None	Yes	No	No	None	Negative					114/70	132	37	0	No	No	No	Negative	29	218	Above 90	Negative or Trace	No
116	2020-10-12	50	Female	Muganda	Divorced or seperated	Primary	Catholic	Unemployed		No	Yes	No		No	No	No	Yes	No	Yes	No	No	Known ISS	No	No	No	Anti hypertensives	Positive	Yes	2 to <5 years	TDF/3TC/DTG	None	107/75	66	37	0	No	No	No	Positive	50	126	Above 90	Negative	No
118	2020-10-08	68	Male	Muganda	Married	Primary	Catholic	Peasant Farmer		Yes	Yes	Yes	Less than 2	No	No	No	No	No	No	No	No	None	Yes	No	No	None	Negative					117/72	89	39	0	No	No	No	Negative	40	134	Above 90	Negative	No
119	2020-10-08	36	Male	Others	Married	Primary	Catholic	Peasant Farmer		No	Yes	Yes	2 and above	Yes	No	No	No	No	No	No	No	None	No	No	No	None	Positive	No	<1 year	Defaulted		151/93	82	37	0	No	No	No	Positive	28	195	Above 90	Negative or Trace	No
120	2020-10-08	58	Male	Muganda	Married	Secondary	Catholic	Peasant Farmer		No	No	Yes	2 and above	No	No	No	No	No	No	No	No	None	No	No	No	None	Negative					105/52	95	36	0	No	No	No	Negative	80	108	Above 90	Negative or Trace	No
230	2020-10-28	43	Female	Banyakitara	Married	Primary	Catholic	Peasant Farmer		Yes	Yes	No		No	No	No	No	No	No	No	No	Known ISS	No	No	No	ART, Septrin	Positive	Yes	5 to 10 years	TDF/3TC/EFV	None	105/77	89	37	0	No	No	No	Positive	36	147	Above 90	Negative	No
232	2020-10-28	52	Female	Banyakitara	Married	Primary	Catholic	Operate business		No	No	Yes	Less than 2	No	No	No	No	No	No	No	No	None	Yes	No	No	None	Negative					104/64	75	36	0	No	No	No	Negative	63	113	Above 90	Negative	No
233	2020-10-28	55	Female	Muganda	Married	Primary	Catholic	Peasant Farmer		Yes	No	Yes	Less than 2	No	No	No	No	No	No	No	No	None	Yes	No	No	None	Negative					182/81	81	40	0	No	No	No	Negative	51	120	Above 90	Negative	No
235	2020-10-28	30	Male	Muganda	Married	Primary	Catholic	Operate business		No	No	No		No	No	No	No	No	No	No	No	None	No	No	No	None	Negative					112/63	64	36	0	No	No	No	Negative	68	141	Above 90	Negative	No
236	2020-10-28	62	Male	Muganda	Married	Primary	Catholic	Peasant Farmer		No	No	Yes	2 and above	Yes	No	No	No	No	No	No	No	None	Yes	No	No	None	Negative					105/91	104	35	0	No	No	No	Negative	54	124	Above 90	Negative	No
238	2020-10-28	71	Male	Muganda	Married	Primary	Moslem	Peasant Farmer		Yes	Yes	Yes	2 and above	Yes	No	No	No	No	No	No	No	None	Yes	No	No	None	Negative					131/79	98	36	0	No	No	No	Negative	69	105	Above 90	Negative	No
241	2020-10-29	74	Male	Muganda	Widower or Widow	Primary	Catholic	Peasant Farmer		Yes	No	Yes	2 and above	Yes	No	No	No	No	No	No	No	None	Yes	No	No	None	Negative					81/47	69	37	1	Yes	No	No	Negative	64	106	Above 90	Negative	No
242	2020-10-29	71	Male	Others	Married	Primary	Protestant	Peasant Farmer		No	Yes	No		No	No	No	No	No	No	No	No	None	Yes	No	No	None	Negative					114/64	72	37	0	No	No	No	Negative	65	108	Above 90	Negative	No
243	2020-10-29	39	Male	Muganda	Divorced or seperated	Secondary	Moslem	Peasant Farmer		No	Yes	Yes	2 and above	No	No	No	No	No	No	No	No	None	Yes	No	No	None	Negative					107/70	85	36	0	No	No	No	Negative	63	137	Above 90	Negative	No
244	2020-10-29	47	Male	Banyakitara	Divorced or seperated	No Education	Catholic	Peasant Farmer		No	No	No		No	No	No	No	No	No	No	No	None	Yes	No	No	None	Negative					116/63	89	36	0	No	No	No	Negative	48	145	Above 90	Negative	No
246	2020-10-29	80	Male	Muganda	Married	Primary	Catholic	Peasant Farmer		No	No	Yes	2 and above	Yes	No	No	No	No	No	No	No	None	Yes	No	No	None	Negative					125/72	76	37	0	No	No	No	Negative	38	126	Above 90	Negative	No
250	2020-10-30	38	Female	Muganda	Divorced or seperated	Primary	Catholic	Operate business		Yes	No	No		No	No	No	No	No	No	No	No	Known ISS	No	No	No	ART,Septrin	Positive	Yes	5 to 10 years	TDF/3TC/EFV		83/57	132	38	1	Yes	No	No	Positive	18	191	Above 90	Negative	No
251	2020-10-30	35	Female	Muganda	Divorced or seperated	Primary	Catholic	Peasant Farmer		Yes	Yes	Yes	2 and above	No	No	No	No	No	No	No	No	Known ISS	No	No	No	ART, Septrin	Positive	Yes	5 to 10 years	TDF/3TC/EFV		104/67	64	36	0	No	No	No	Positive	60	131	Above 90	Negative	No
252	2020-10-30	23	Female	Muganda	Married	Primary	Moslem	Operate business		No	Yes	No		No	No	No	No	No	No	No	No	None	No	No	No	None	Positive	No		ART Naive		133/100	125	36	1	No	Yes	No	Positive	43	160	Above 90	Negative	No
253	2020-10-30	20	Female	Muganda	Single	Primary	Moslem	Operate business		Yes	Yes	Yes	2 and above	No	No	No	No	No	No	No	No	Known ISS	No	No	No	ART, Septrin	Positive	Yes	5 to 10 years	TDF/3TC/EFV		116/93	113	36	0	No	No	No	Positive	21	206	Above 90	Negative	No
254	2020-10-30	55	Male	Banyakitara	Married	Secondary	Catholic	Operate business		No	Yes	No		Yes	No	No	No	No	No	No	No	None	Yes	No	No	None	Negative					116/78	96	36	0	No	No	No	Negative	60	125	Above 90	Negative	No
257	2020-11-02	24	Female	Muganda	Married	Primary	Catholic	Unemployed		No	No	No		No	No	No	No	No	No	No	No	None	No	Yes	No	None	Negative					130/109	99	36	0	No	No	No	Negative	52	149	Above 90	Negative	No
260	2020-11-02	31	Female	Others	Married	Primary	Moslem	Operate business		No	Yes	Yes	Less than 2	No	No	No	No	No	No	No	No	None	No	No	No	None	Positive	Yes	5 to 10 years	ABC/3TC/EFV	(Y) Not sure	130/106	110	38	1	No	No	Yes	Positive	52	142	Above 90	Negative	No
262	2020-11-02	18	Male	Muganda	Single	Primary	Catholic	Unemployed		No	No	No		No	No	No	No	No	No	No	No	None	Yes	No	No	None	Negative					139/79	111	38	1	No	Yes	No	Negative	48	177	Above 90	Negative	No
263	2020-11-02	33	Male	Muganda	Divorced or seperated	Primary	Catholic	Others	Barber	No	No	Yes	Less than 2	No	No	No	No	No	No	No	No	Known ISS	Yes	No	No	None	Positive	No		ART Naive		160/115	97	37	1	No	Yes	No	Positive	48	160	Above 90	Negative	No
264	2020-11-02	45	Male	Muganda	Married	Primary	Catholic	Others	Fish Monger	No	No	Yes	Less than 2	No	No	No	No	No	No	No	No	None	Yes	No	No	None	Negative					123/76	104	36	1	No	Yes	No	Negative	61	133	Above 90	Negative	No
265	2020-11-03	48	Female	Muganda	Married	Secondary	Catholic	Operate business		No	No	Yes	Less than 2	No	No	No	No	No	No	No	No	None	No	Yes	No	None	Negative					146/103	110	38	0	No	No	No	Negative	61	119	Above 90	Negative	No
266	2020-11-03	41	Female	Banyakitara	Married	Secondary	Born Again	Peasant Farmer		Yes	No	No		No	No	No	No	No	No	No	No	None	No	Yes	No	None	Positive	Yes	10 and over year	TDF/3TC/DTG	Yes-nt sure	136/97	87	37	0	No	No	No	Positive	19	184	Above 90	Negative	No
267	2020-11-03	80	Female	Muganda	Widower or Widow	Secondary	Catholic	Peasant Farmer		Yes	Yes	No		No	No	No	No	No	No	No	No	None	No	Yes	No	None	Negative					161/93	74	35	0	No	No	No	Negative	62	95	Above 90	Negative	No
268	2020-11-03	18	Female	Muganda	Single	Secondary	Catholic	Unemployed		No	Yes	No		No	No	No	No	No	No	No	No	Sickle cell disease, Asthma	No	No	No	Morphine	Negative					104/54	95	37	0	No	No	No	Negative	27	193	Above 90	Negative	No
269	2020-11-03	82	Female	Muganda	Widower or Widow	Primary	Catholic	Unemployed		Yes	Yes	No		Yes	No	No	No	No	No	No	No	None	No	Yes	No	None	Negative					163/73	80	34	0	No	No	No	Negative	56	97	Above 90	Negative	No
273	2020-11-03	75	Male	Muganda	Divorced or seperated	Primary	Moslem	Unemployed		Yes	No	No		No	No	No	No	No	No	No	No	None	No	Yes	No	None	Negative					110/53	94	37	0	No	No	No	Negative	32	122	Above 90	Negative	No
274	2020-11-03	45	Male	Muganda	Widower or Widow	Tertiary	Moslem	Civil/NGO servant		No	Yes	No		Yes	No	No	Yes	No	No	No	No	None	No	No	No	Anti hypertensives	Negative					132/88	63	37	0	No	No	No	Negative	92	100	Above 90	Negative	No
275	2020-11-03	35	Male	Muganda	Married	Primary	Protestant	Operate business		No	Yes	No		No	No	No	No	No	No	No	No	None	Yes	No	No	None	Positive	No		ART Naive		109/91	99	38	1	No	Yes	No	Positive	62	142	Above 90	Negative	No
276	2020-11-04	31	Male	Muganda	Divorced or seperated	Primary	Catholic	Operate business		Yes	Yes	Yes	Less than 2	No	No	No	No	No	No	No	No	Known ISS	No	No	No	ART,Septrin	Positive	Yes	<1 year	TDF/3TC/DTG		110/66	97	38	0	No	No	No	Positive	99	101	Above 90	Negative	No
279	2020-11-04	73	Female	Muganda	Widower or Widow	Primary	Catholic	Peasant Farmer		No	Yes	No		No	No	No	No	No	No	No	No	None	Yes	No	No	None	Negative					97/69	75	37	1	Yes	No	No	Negative	61	100	Above 90	Negative	No
1	2020-09-17	86	Male	Muganda	Divorced or seperated	Primary	Catholic	Peasant Farmer		Yes	Yes	No		No	No	Yes	No	No	No	No	No	None	No	No	No	Oral Hyperglycaemics	Negative					121/75	94	36	1	No	No	Yes	Negative	51	107	Above 90	Negative	No
4	2020-09-17	52	Male	Others	Married	Primary	Moslem	Others	Taxi Driver	No	Yes	Yes	2 and above	Yes	No	No	Yes	No	No	No	No	None	No	No	No	Amilodipine,Aprinox,Captopril,Paracet	Negative					176/110	77	35	1	No	Yes	No	Negative	48	140	Above 90	Negative	No
7	2020-09-18	40	Male	Muganda	Married	Secondary	Catholic	Peasant Farmer		No	Yes	Yes	Less than 2	No	No	No	No	No	No	No	No	None	No	Yes	Yes	None	Positive	Yes	<1 year	TDF/3TC/DTG		126/86	89	37	0	No	No	No	Positive	69	131	Above 90	Negative	No
9	2020-09-24	23	Male	Muganda	Married	Primary	Catholic	Peasant Farmer		Yes	Yes	No		No	No	No	No	No	No	No	No	Sickle cell disease	No	No	No	Folic Acid	Negative					122/86	58	36	1	No	No	Yes	Negative	66	150	Above 90	Negative	No
10	2020-09-21	68	Female	Banyakitara	Widower or Widow	No Education	Catholic	Peasant Farmer		No	No	Yes	2 and above	Yes	No	Yes	No	No	No	No	No	None	No	No	No	Insulin	Negative					122/79	89	36	0	No	No	No	Negative	46	114	Above 90	Negative	No
12	2020-09-18	26	Male	Muganda	Divorced or seperated	Secondary	Catholic	Others	Taxi Driver	No	No	No		No	No	No	No	No	No	No	No	Known ISS	No	No	No	ART, Septrin	Positive	Yes	2 to <5 years	AZT/3TC/LPV/r	TDF/3TC/EFV	104/61	107	37	0	No	No	No	Positive	54	160	Above 90	Negative	No
13	2020-09-18	21	Male	Muganda	Single	Primary	Catholic	Unemployed		No	No	No		No	No	Yes	No	No	No	No	No		No	No	No	Insulin	Negative					115/69	77	37	0	No	No	No	Negative	37	193	Above 90	Negative	No
14	2020-09-28	47	Male	Others	Married	No Education	Catholic	Peasant Farmer		Yes	Yes	Yes	2 and above	Yes	No	No	No	No	No	No	No	None	No	No	No	None	Negative					115/83	65	36	0	No	No	No	Negative	54	138	Above 90	Negative	No
16	2020-09-21	30	Female	Muganda	Divorced or seperated	Primary	Catholic	Operate business		Yes	Yes	Yes	2 and above	No	No	No	No	No	No	No	No	ISS	No	No	No	ART,Septrin	Positive	Yes	<1 year	TDF/3TC/DTG		101/81	97	35	0	No	No	No	Positive	38	158	Above 90	Negative	No
17	2020-09-21	30	Female	Muganda	Married	Primary	Catholic	Unemployed		Yes	Yes	No		No	No	No	No	No	No	No	No	ISS, PTB	No	No	No	ART CTX,Anti TBs,Lasix ,Spirinolactone	Positive	Yes	2 to <5 years	TDF/3TC/EFV		94/62	132	37	2	Yes	No	Yes	Positive	39	157	Above 90	Negative	No
18	2020-09-21	57	Female	Muganda	Widower or Widow	No Education	Born Again	Peasant Farmer		No	No	Yes	Less than 2	No	No	No	No	No	No	No	No	Known ISS	No	No	No	ART,Seprin,Fluconazole	Positive	Yes	10 and over year	TDF/3TC/DTG	TDF/3TC/EFV	93/97	103	34	2	Yes	Yes	No	Positive	53	117	Above 90	Negative	No
19	2020-09-21	43	Female	Muganda	Married	Primary	Catholic	Others	VHT	No	No	No		No	No	Yes	No	No	No	No	No	None	No	No	No	Metformin , Glibenclamide	Negative					116/63	102	35	0	No	No	No	Negative	49	133	Above 90	Negative	No
20	2020-09-30	97	Male	Banyakitara	Married	No Education	Born Again	Peasant Farmer		No	Yes	No		No	No	Yes	No	No	No	No	No	None	No	No	No	Anti hyperglcaemics	Negative					134/90	73	34	0	No	No	No	Negative	22	140	Above 90	Negative	No
21	2020-09-21	54	Female	Muganda	Married	Primary	Catholic	Operate business		No	Yes	No		No	No	No	Yes	No	No	No	No		No	No	No	ART	Positive	Yes	10 and over year	TDF/3TC/DTG	AZT/3TC/NVP	130/97	120	37	0	No	No	No	Positive	54	119	Above 90	Negative	No
23	2020-09-21	68	Male	Others	Married	Primary	Protestant	Peasant Farmer		No	Yes	Yes	2 and above	Yes	No	No	No	No	No	No	No	None	No	No	Yes	None	Negative					100/60	80	37	1	Yes	No	No	Negative	52	121	Above 90	Negative	No
24	2020-09-21	28	Male	Muganda	Single	Secondary	Protestant	Peasant Farmer		No	Yes	Yes	Less than 2	No	No	No	No	No	No	No	No	None	Yes	No	No	None	Negative					90/70	89	34	3	Yes	Yes	Yes	Negative	37	184	Above 90	Negative	No
25	2021-09-21	30	Male	Muganda	Single	Secondary	Catholic	Peasant Farmer		No	No	No		No	Yes	No	No	No	No	No	No	None	No	No	Yes	None	Positive	Yes	2 to <5 years	TDF/3TC/DTG		120/60	86	36	0	No	No	No	Positive	90	114	Above 90	Negative	No
26	2020-09-21	27	Male	Muganda	Married	Tertiary	Catholic	Operate business		Yes	No	No		No	No	No	No	No	No	No	No	None	No	No	Yes	None	Negative					110/60	78	36	0	No	No	No	Negative	77	137	Above 90	Negative	No
27	2020-09-23	39	Female	Muganda	Widower or Widow	Primary	Catholic	Peasant Farmer		Yes	Yes	Yes	Less than 2	Yes	No	No	No	No	No	No	No	Known ISS	No	No	No	ART,Septrin	Positive	Yes	<1 year	ABC/3TC/DTG		97/59	66	36	1	Yes	No	No	Positive	39	147	Above 90	Negative	No
28	2020-09-21	70	Female	Muganda	Divorced or seperated	Primary	Catholic	Peasant Farmer		No	No	No		No	No	No	Yes	No	No	No	No	None	No	No	No	Anti hypertensives	Negative					131/76	82	36	1	No	No	Yes	Negative	57	105	Above 90	Negative	No
29	2020-09-21	78	Female	Muganda	Widower or Widow	Primary	Catholic	Peasant Farmer		Yes	Yes	No		No	No	Yes	Yes	No	No	No	No	None	No	No	No	Anti hypertensives and hyperglycaemics	Negative					117/66	124	36	0	No	No	No	Negative	35	116	Above 90	Negative	No
30	2020-09-23	64	Female	Others	Widower or Widow	Primary	Protestant	Peasant Farmer		Yes	Yes	No		Yes	No	No	Yes	No	No	No	No	None	No	No	No	Anti hypertensives	Negative					141/74	61	37	0	No	No	No	Negative	51	113	Above 90	Negative	No
32	2020-09-22	38	Male	Muganda	Married	Primary	Catholic	Others	Taxi driver	No	No	No		No	No	Yes	Yes	No	No	No	No	Known ISS	No	No	No	ART,Septrin	Positive	Yes	2 to <5 years	TDF/3TC/DTG		185/80	89	36	0	No	No	No	Positive	69	133	Above 90	Negative	No
35	2020-09-22	60	Male	Banyakitara	Married	Primary	Born Again	Peasant Farmer		Yes	No	No		No	No	No	Yes	No	No	No	No	Known ISS	No	No	No	ART, Septrin	Positive	Yes	<1 year	TDF/3TC/DTG	None	95/59	77	36	1	Yes	No	No	Positive	1	648	Above 90	Negative	No
36	2020-09-22	53	Male	Muganda	Widower or Widow	Primary	Catholic	Others	Carpenter	Yes	Yes	Yes	Less than 2	No	No	No	No	No	No	No	No	Epilepsy	Yes	No	No	None	Negative					123/94	94	36	0	No	No	No	Negative	48	139	Above 90	Negative	No
39	2020-09-22	33	Male	Muganda	Married	Primary	Catholic	Others	Fish Monger	Yes	No	Yes	2 and above	No	No	No	No	No	No	No	No	None	Yes	No	No	None	Negative					141/84	158	36	0	No	No	No	Negative	76	132	Above 90	Negative	No
40	2020-09-22	18	Male	Muganda	Single	Primary	Catholic	Unemployed		Yes	Yes	No		No	No	No	No	No	No	No	No	None	Yes	No	No	None	Negative					134/80	47	36	0	No	No	No	Negative	33	207	Above 90	Negative	No
41	2020-09-23	47	Female	Muganda	Divorced or seperated	Tertiary	Moslem	Peasant Farmer		Yes	Yes	No		No	No	No	No	No	No	No	No	None	No	No	Yes	None	Negative					146/82	73	36	0	No	No	No	Negative	60	121	Above 90	Negative	No
43	2020-09-23	55	Female	Muganda	Divorced or seperated	Primary	Catholic	Peasant Farmer		No	No	No		No	No	No	No	No	No	No	No	None	No	Yes	No	None	Negative					140/64	66	36	0	No	No	No	Negative	51	120	Above 90	Negative	No
48	2020-09-24	30	Male	Others	Single	Secondary	Born Again	Operate business		No	Yes	Yes	Less than 2	No	No	No	No	No	No	No	No	None	Yes	No	No	None	Negative					116/99	71	36	0	No	No	No	Negative	58	151	Above 90	Negative	No
49	2020-09-24	55	Male	Others	Married	No Education	Protestant	Peasant Farmer		Yes	Yes	Yes	2 and above	Yes	No	No	No	No	No	No	No	None	Yes	No	No	None	Negative					92/60	105	35	2	Yes	No	Yes	Negative	37	152	Above 90	Negative	No
51	2020-09-24	47	Male	Muganda	Divorced or seperated	Secondary	Catholic	Operate business		Yes	Yes	Yes	Less than 2	Yes	No	No	No	No	No	No	Yes	None	No	No	No	Radiotherapy	Positive	Yes	10 and over year	TDF/3TC/DTG	TDF/3TC/EFV	99/75	107	37	2	Yes	No	Yes	Positive	54	138	Above 90	Trace	No
52	2020-09-25	39	Male	Muganda	Married	Primary	Catholic	Others	Builder	Yes	No	Yes	Less than 2	No	No	No	No	No	No	No	No	Known ISS	No	No	No	ART,Septrin	Positive	Yes	<1 year	TDF/3TC/EFV	None	116/76	96	37	0	No	No	No	Positive	61	139	Above 90	Negative	No
56	2020-09-25	52	Female	Others	Married	No Education	Protestant	Unemployed		No	No	Yes	Less than 2	Yes	No	Yes	Yes	No	No	No	No		No	Yes	No	Metformin, Glibenclamide	Negative					123/72	70	35	0	No	No	No	Negative	45	128	Above 90	Negative	No
57	2020-09-25	40	Female	Others	Divorced or seperated	No Education	Catholic	Operate business		No	No	No		No	No	No	No	No	No	No	No	None	No	Yes	No	None	Negative					101/75	121	36	1	No	No	Yes	Negative	50	135	Above 90	Negative	No
15	2020-09-21	33	Female	Muganda	Divorced or seperated	Primary	Catholic	Operate business		Yes	No	No		No	No	No	No	No	Yes	No	No	Known ISS	No	No	No	ART,Lasix,Captopril,spinolactone	Positive	Yes	<1 year	TDF/3TC/DTG	None	96/57	114	31	2	Yes	No	yes	Positive	110	66	60-89	Negative or Trace	Yes	Client died
122	2020-10-13	40	Female	Muganda	Divorced or seperated	Primary	Catholic	Unemployed		No	No	No		No	No	No	No	No	No	No	No	Known ISS	No	No	No	ART,Septrin	Positive	No		ART Naive	None	88/43	120	36	3	Yes	Yes	yes	Positive	283	20	15-29	1+	Yes	Client died
55	2020-09-21	70	Male	Muganda	Married	Primary	Catholic	Peasant Farmer		No	Yes	Yes	2 and above	Yes	No	No	Yes	No	No	No	No	Known ISS	No	No	No	Anti hypertensives,ART,Septrin	Positive	Yes	2 to <5 years	Defaulted		192/101	56	37	2	No	Yes	yes	Positive	117	63	60-89	Negative	Yes	Client Lost to follow up
369	2020-11-26	41	Female	Muganda	Divorced or seperated	Secondary	Catholic	Operate business		Yes	No	No		No	No	Yes	Yes	No	No	No	No	Known ISS	No	No	No	Anti hypertensives and Hyperglycaemics	Positive	Yes	2 to <5 years	ABC/3TC/EFV	AZT/3TC/EFV	174/118	81	36	0	No	No	No	Positive	241	24	15-29	3+	Yes	Client died
302	2020-11-09	86	Male	Muganda	Widower or Widow	Primary	Catholic	Peasant Farmer		Yes	No	No		No	No	No	Yes	No	No	No	No		No	No	No	Anti hypertensives	Negative					162/133	82	37	0	No	No	No	Negative	163	38	15-29	Negative	Yes	Client died
322	2020-11-13	51	Male	Muganda	Single	Secondary	Protestant	Peasant Farmer		Yes	No	Yes	2 and above	Yes	No	No	No	No	No	No	No	None	yes	No	No	NONE	Negative					169/121	66	36	0	No	No	yes	Negative	492	13	Less than 15	Negative	Yes	Client died
318	2020-11-12	28	Male	Others	Single	Secondary	Born Again	Operate business		No	No	No		No	No	No	No	No	No	No	No	NONE	yes	No	No	NONE	Negative					129/83	85	37	0	No	No	No	Negative	1090	6	Less than 15	3+	Yes	Client died
327	2020-11-13	78	Male	Others	Divorced or seperated	Primary	Catholic	Peasant Farmer		Yes	No	Yes	2 and above	No	No	No	No	No	No	No	No	NONE	No	No	No	NONE	Negative					114/67	94	38	1	No	Yes	No	Negative	45	119	Above 90	3+	Yes	Client died
326	2020-11-13	28	Male	Banyakitara	Divorced or seperated	Primary	Catholic	Peasant Farmer		No	No	No		No	No	No	No	No	No	No	No	Known ISS	No	No	No	ART,Septrin	Positive	Yes	2 to <5 years	TDF/3TC/EFV		101/70	77	37	0	No	No	No	Positive	947	7	Less than 15	1+	Yes	Client died
345	2020-11-17	85	Male	Banyakitara	Married	Primary	Catholic	Peasant Farmer		Yes	No	No		No	No	No	No	No	No	No	No	NONE	No	No	No	NONE	Negative					134/71	107	39	1	No	Yes	No	Negative	205	29	15-29	Negative	Yes	Client died
332	2020-11-16	27	Female	Muganda	Single	Secondary	Moslem	Operate business		Yes	Yes	No		No	No	No	No	No	No	No	No	Known ISS	No	No	No	ART,Septrin	Positive	Yes	<1 year	TDF/3TC/DTG	None	119/83	113	37	2	No	Yes	yes	Positive	62	137	Above 90	3+	Yes	Client died
339	2020-11-17	21	Male	Banyakitara	Single	No Education	Protestant	Peasant Farmer		Yes	No	No		No	No	No	No	No	No	No	No	NONE	No	No	No	NONE	Negative					116/79	75	37	0	No	No	No	Negative	766	9	Less than 15	Negative	Yes	Client died
338	2020-11-16	35	Male	Muganda	Divorced or seperated	No Education	Catholic	Others	fish monger	No	No	Yes	2 and above	No	No	No	No	No	No	No	No	NO	yes	No	No	NONE	Negative					106/82	91	37	0	No	No	No	Negative	146	61	60-89	Negative	Yes	Client died
364	2020-11-24	30	Female	Muganda	Married	Secondary	Catholic	Operate business		No	No	Yes	2 and above	No	No	No	No	No	No	No	No	Known ISS	No	No	No	ART,Septrin	Positive	Yes	5 to 10 years	ABC/3TC/DTG	TDF/3TC/EFV	196/146	119	36	0	No	No	No	Positive	1336	3	Less than 15	2+	Yes	Client died
367	2020-11-24	23	Female	Muganda	Single	Primary	Moslem	Peasant Farmer		Yes	Yes	No		No	No	No	No	No	No	No	No	Known ISS	No	No	No	ART ,Septrin	Positive	Yes	<1 year	TDF/3TC/EFV	NONE	106/72	83	39	1	No	Yes	No	Positive	332	19	15-29	Negative	Yes	Client died
353	2020-11-19	56	Male	Others	Married	Primary	Catholic	Peasant Farmer		No	Yes	Yes	Less than 2	Yes	No	No	No	No	No	No	No	NONE	yes	No	No	NONE	Negative					91/52	86	37	1	Yes	No	No	Negative	124	64	60-89	Negative	Yes	Client died
361	2020-11-20	38	Female	Banyakitara	Widower or Widow	Primary	Born Again	Operate business		No	No	No		No	No	No	No	No	No	No	No	Known ISS	No	No	No	ART,Septrin	Positive	Yes	<1 year	TDF/3TC/DTG		114/71	94	35	0	No	No	No	Positive	618	8	Less than 15	2+	Yes	Client died
362	2020-11-24	34	Female	Muganda	Divorced or seperated	Primary	Catholic	Peasant Farmer		Yes	Yes	No		No	No	No	No	No	No	No	No	NONE	yes	No	No	NONE	Negative					96/80	63	36	1	Yes	No	No	Negative	466	11	Less than 15	1+	Yes	Client died
231	2020-10-28	52	Female	Banyakitara	Divorced or seperated	Primary	Born Again	Operate business		Yes	No	No		No	No	No	Yes	No	No	No	No		No	No	No	Anti hypertensives	Negative					157/104	110	38	0	No	No	No	Negative	1293	3	Less than 15	1+	Yes	Client died
240	2020-10-28	50	Male	Muganda	Married	Primary	Moslem	Operate business		Yes	Yes	No		No	No	Yes	Yes	No	No	No	No		No	No	No	Anti hypertensives, insulin	Negative					195/111	63	36	0	No	No	No	Negative	609	10	Less than 15	Negative	Yes	Client died
248	2020-10-29	67	Male	Muganda	Divorced or seperated	Primary	Catholic	Peasant Farmer		Yes	No	Yes	2 and above	No	No	No	No	No	No	No	No	NONE	yes	No	No	NONE	Negative					129/114	97	37	0	No	No	No	Negative	126	59	Less than 15	Negative	Yes	Client died
249	2020-10-30	53	Female	Muganda	Married	Secondary	Catholic	Peasant Farmer		Yes	Yes	No		No	No	No	No	No	No	No	No	Known ISS	No	No	No	ART,Septrin	Positive	Yes	2 to <5 years	ABC/3TC/DTG	NONE	83/44	112	36	1	Yes	No	No	Positive	419	11	Less than 15	1+	Yes	Client died
365	2020-11-25	52	Male	Muganda	Married	Primary	Catholic	Peasant Farmer		No	Yes	Yes	2 and above	Yes	No	No	No	No	No	No	No	NONE	Yes	No	No	NONE	Negative					167/94	81	38	0	No	No	No	Negative	1764	3	Less than 15	2+	Yes	Client died
2	2020-09-17	18	Male	Muganda	Single	Primary	Catholic	Unemployed		Yes	No	No		No	No	No	No	No	No	No	No	NONE	yes	No	No	NONE	Negative					132/94	113	36	0	No	No	No	Negative	526	15	15-29	2+	Yes	Client died
33	2020-09-22	80	Male	Banyakitara	Married	No Education	Moslem	Peasant Farmer		No	Yes	No		No	No	No	Yes	No	Yes	No	No		No	No	No	lasix,spirinolactone	Negative					118/80	89	35	0	No	No	No	Negative	100	71	60-89	Negative	Yes	Client died
5	2020-09-17	34	Male	Others	Single	Secondary	Moslem	Others	Builder	No	No	Yes	Less than 2	Yes	No	No	Yes	No	No	No	No		No	No	Yes	unknown drugs	Negative					122/84	128	38	2	No	Yes	yes	Negative	205	41	15-29	2+	Yes	Client died
247	2020-10-29	50	Male	Banyakitara	Divorced or seperated	No Education	Protestant	Operate business		No	No	Yes	2 and above	Yes	No	No	No	No	No	No	No	NONE	yes	No	No	NONE	Negative					113/80	70	37	0	No	No	No	Negative	75	118	Above 90	2+	Yes	Client died
6	2020-09-18	55	Male	Muganda	Married	Primary	Moslem	Operate business		No	Yes	Yes	Less than 2	No	No	No	No	No	No	No	No	NONE	No	Yes	Yes		Negative					117/99	88	35	0	No	No	No	Negative	123	66	60-89	Negative	Yes	Client died
37	2020-09-25	43	Male	Muganda	Married	Primary	Catholic	Peasant Farmer		Yes	Yes	No		No	No	No	Yes	No	No	No	No	NONE	No	No	Yes	NONE	Negative					169/116	54	34	0	No	No	No	Negative	1795	3	Less than 15	Negative	Yes	Client died
85	2020-10-05	55	Male	Muganda	Married	Primary	Catholic	Peasant Farmer		Yes	No	Yes	2 and above	No	No	No	Yes	No	No	No	No	NONE	No	No	No	Anti hypertensives	Negative					148/89	63	36	0	No	No	No	Negative	2342	2	Less than 15	Trace	Yes	Client died
91	2020-10-05	37	Female	Muganda	Married	Tertiary	Born Again	Peasant Farmer		Yes	Yes	No		No	No	Yes	No	No	No	No	No	NONE	No	No	No	Anti hyperglycaemics	Negative					131/105	130	37	1	No	Yes	No	Negative	71	109	Above 90	2+	Yes	Client died
108	2020-10-07	36	Male	Muganda	Married	Primary	Catholic	Others	Taxi driver	Yes	Yes	Yes	Less than 2	No	No	No	Yes	No	No	No	No	Known ISS	No	No	No	ART, Septrin	Positive	Yes	<1 year	TDF/3TC/DTG	None	135/93	78	36	0	No	No	No	Positive	799	8	Less than 15	2+	Yes	Client died
117	2020-10-08	82	Male	Muganda	Married	No Education	Catholic	Peasant Farmer		No	No	Yes	Less than 2	No	No	No	No	No	No	No	No	NONE	No	No	No	NONE	Negative					135/65	82	37	0	No	No	No	Negative	86	84	60-89	Negative	Yes	Client died
67	2020-09-28	34	Female	Banyakitara	Married	Primary	Born Again	Peasant Farmer		Yes	Yes	No		No	No	No	Yes	No	Yes	No	No		No	No	No	Lasix	Negative					151/122	115	35	1	No	No	yes	Negative	440	12	Less than 15	2+	Yes	Client died
63	2020-09-28	26	Male	Muganda	Single	Secondary	Catholic	Others	Engineer	Yes	No	Yes	2 and above	No	No	No	No	No	No	No	No	NONE	No	No	No	NONE	Negative					94/67	92	35	1	Yes	No	No	Negative	652	11	Less than 15	1+	Yes	Client died
58	2020-09-25	74	Female	Muganda	Widower or Widow	Primary	Moslem	Peasant Farmer		Yes	Yes	No		No	No	Yes	Yes	No	No	No	No		No	No	No	Anti malarials	Negative					150/95	94	37	2	No	Yes	yes	Negative	94	69	60-89	Negative	Yes	Client died
272	2020-11-03	64	Female	Others	Married	Primary	Catholic	Peasant Farmer		Yes	Yes	No		No	No	No	Yes	Yes	Yes	No	No	PUD	No	Yes	No	Morphine	Negative					134/77	53	35	0	No	No	No	Negative	97	62	60-89	Negative	Yes	Client died
96	2020-10-06	85	Female	Muganda	Married	No Education	Moslem	Peasant Farmer		Yes	No	No		No	No	Yes	No	No	No	No	No	Known ISS	No	No	No	NONE	Positive	Yes	5 to 10 years	TDF/3TC/EFV	NONE	90/60	90	32	1	Yes	No	No	Positive	64	88	60-89	Negative	Yes	Client died
245	2020-10-29	54	Male	Others	Divorced or seperated	Primary	Moslem	Unemployed		No	Yes	No		Yes	No	No	No	No	No	No	No	NONE	yes	No	No	NONE	Negative					100/69	103	35	1	No	No	Yes	Negative	96	89	60-89	Negative or Trace	Yes	Client died
259	2020-11-02	66	Female	Muganda	Widower or Widow	Primary	Catholic	Peasant Farmer		No	Yes	No		No	No	Yes	Yes	No	No	No	No	PUD	No	Yes	Yes		Negative					123/59	74	39	0	No	No	No	Negative	122	46	45-59	1+	Yes	Client died
350	2020-11-18	76	Female	Muganda	Widower or Widow	Primary	Catholic	Peasant Farmer		Yes	Yes	No		No	No	No	No	No	No	No	No	NONE	No	Yes	No	NONE	Negative					121/59	78	37	0	No	No	No	Negative	77	75	60-89	Negative	Yes	Client died
54	2020-09-25	58	Female	Others	Widower or Widow	No Education	Catholic	Peasant Farmer		No	Yes	Yes	Less than 2	Yes	No	Yes	No	No	No	No	No	Known ISS	No	No	No	Insulin,ART,Septrin	Positive	Yes	10 and over year	TDF/3TC/DTG	TDF/3TC/EFV	109/80	100	37	2	No	Yes	yes	Positive	76	86	60-89	2+	Yes	Client died
38	2020-09-22	63	Male	Muganda	Married	Tertiary	Moslem	Others	Teacher	No	Yes	No		No	No	Yes	Yes	No	No	No	No		No	No	No	Anti hypertensives Anti hyperglyceamics	Negative					117/80	129	38	1	No	Yes	No	Negative	79	105	Above 90	2+	Yes	Client died
185	2020-10-20	23	Female	Muganda	Divorced or seperated	Secondary	Protestant	Unemployed		Yes	Yes	No		No	No	No	Yes	No	No	No	No		No	Yes	No	Anti hypertensives	Negative					149/117	124	361	1	No	No	Yes	Negative	288	22	15-29	Negative	Yes	Client died
115	2020-10-08	74	Male	Muganda	Married	Secondary	Catholic	Peasant Farmer		Yes	Yes	Yes	2 and above	No	No	No	No	No	No	No	No	NONE	Yes	No	No	NONE	Negative					137/74	68	36	0	No	No	No	Negative	62	35	30-44	2+	Yes	Client died
172	2020-10-19	40	Female	Muganda	Married	Primary	Moslem	Unemployed		Yes	Yes	No		No	No	No	No	Yes	No	No	No	Known ISS	No	No	No	ART,Septrin	Positive	Yes	5 to 10 years	TDF/3TC/EFV		99/66	76	37	1	Yes	No	No	Positive	166	38	15-29	Negative	Yes	Client died
34	2020-09-22	75	Male	Banyakitara	Married	No Education	Catholic	Others	Builder	No	No	Yes	2 and above	No	No	No	No	No	Yes	No	No		No	Yes	No	None	Negative					106/65	78	35	0	No	No	No	Negative	116	61	60-89	Negative	Yes	Client died
76	2020-09-30	60	Female	Others	Divorced or seperated	No Education	Moslem	Peasant Farmer		No	Yes	No		No	No	No	No	No	No	No	No	NONE	yes	No	No	NONE	Negative					85/57	115	38	3	Yes	Yes	Yes	Negative	153	37	15-29	Negative	Yes	Client died
44	2020-09-23	52	Female	Muganda	Married	Primary	Protestant	Peasant Farmer		No	Yes	Yes	Less than 2	No	No	No	No	No	No	No	No	Known ISS	No	No	No	ART,Septrin	Positive	Yes	5 to 10 years	TDF/3TC/DTG	TDF/3TC/EFV	80/56	158	36	2	Yes	No	Yes	Positive	434	11	Less than 15	2+	Yes	Client died
256	2020-11-02	69	Male	Muganda	Married	Tertiary	Catholic	Civil/NGO servant		No	No	Yes	Less than 2	Yes	No	No	No	No	No	No	No	NONE	yes	No	No	NONE	Negative					173/107	103	370	0	No	No	No	Negative	216	30	15-29	Negative	Yes	Client died
81	2020-10-01	40	Male	Banyakitara	Married	No Education	Moslem	Operate business		No	No	Yes	Less than 2	No	No	No	No	No	No	No	No	Known ISS	No	No	No	ART, Septrin	Positive	Yes	5 to 10 years	TDF/3TC/ATVr	AZT/3TC/EFV	102/57	80	38	0	No	No	No	Positive	107	86	60-89	Negative	Yes	Client died
215	2020-10-27	70	Female	Muganda	Widower or Widow	Primary	Catholic	Peasant Farmer		No	No	No		No	No	No	No	No	No	No	No	NONE	yes	No	No	NONE	Negative					106/58	111	37	0	No	No	No	Negative	97	59	60-89	Negative	Yes	Client died
47	2020-09-24	60	Male	Muganda	Divorced or seperated	Primary	Catholic	Peasant Farmer		No	No	Yes	2 and above	Yes	No	No	No	No	No	No	No	NONE	No	No	No	NONE	Negative					125/74	107	37	2	No	Yes	yes	Negative	160	46	45-59	2+	Yes	Client died
309	2020-11-11	78	Female	Muganda	Widower or Widow	Primary	Catholic	Peasant Farmer		No	Yes	No		No	No	Yes	Yes	No	No	No	No		No	No	No	Anti hypertensives and Hyperglycaemics	Negative					166/98	87	36	0	No	No	No	Negative	69	84	60-89	Negative	Yes	Client died
271	2020-11-03	39	Female	Muganda	Divorced or seperated	Secondary	Catholic	Civil/NGO servant		Yes	Yes	Yes	Less than 2	No	No	No	No	No	No	No	No	Known ISS	No	No	No	ART	Positive	Yes	10 and over year	TDF/3TC/DTG	TDF/3TC/EFV	93/62	96	36	2	Yes	No	yes	Positive	568	9	Less than 15	2+	Yes	Client died
270	2020-11-03	85	Female	Others	Widower or Widow	Primary	SDA	Peasant Farmer		No	Yes	No		Yes	No	No	No	No	Yes	No	No	None	No	Yes	No		Negative					117/76	125	35	1	No	No	yes	Negative	85	65	60-89	2+	Yes	Client died
278	2020-11-04	30	Female	Muganda	Divorced or seperated	Primary	Born Again	Operate business		Yes	Yes	Yes	2 and above	No	No	No	No	No	No	No	No	known ISS	No	No	No	ART,Septrin	Positive	Yes	10 and over year	TDF/3TC/DTG	TDF/3TC/EFV	108/83	110	36	0	No	No	No	Positive	135	52	45-59	Negative	Yes	Client died
145	2020-10-14	70	Male	Others	Widower or Widow	Primary	Catholic	Peasant Farmer		Yes	No	Yes	2 and above	Yes	No	No	No	No	No	No	No	Known ISS	No	No	No	Septrin , ART	Positive	Yes	10 and over year	TDF/3TC/DTG	TDF/3TC/EFV	96/64	104	33	1	Yes	No	No	Positive	380	15	15-29	Negative	Yes	Client died
217	2020-10-26	25	Male	Muganda	Single	Secondary	Catholic	Peasant Farmer		Yes	Yes	No		No	No	No	No	No	No	No	No	NONE	yes	No	No	NONE	Negative					149/98	69	35	0	No	No	No	Negative	1322	5	Less than 15	2+	Yes	Client died
354	2020-11-19	69	Female	Others	Widower or Widow	Primary	Born Again	Peasant Farmer		No	No	No		Yes	No	No	No	No	No	No	No	Asthma	No	No	Yes		Negative					143/88	97	36	1	No	No	yes	Negative	73	84	60-89	Negative	Yes	Client died
277	2020-11-03	28	Female	Muganda	Married	Primary	Catholic	Unemployed		Yes	Yes	No		No	No	No	Yes	No	Yes	No	No		No	Yes	Yes		Negative					181/135	70	35	1	No	No	Yes	Negative	1179	4	Less than 15	1+	Yes	Client died
287	2020-11-05	92	Female	Muganda	Widower or Widow	No Education	Protestant	Unemployed		No	Yes	No		No	No	No	Yes	No	No	No	No		No	Yes	Yes		Negative					145/89	84	37	1	No	Yes	No	Negative	99	49	45-59	Negative	Yes	Client died
46	2021-09-24	68	Male	Muganda	Divorced or seperated	Secondary	Protestant	Unemployed		Yes	No	Yes	Less than 2	Yes	No	No	No	No	No	No	No	Known ISS	No	No	No	ART, Septrin	Positive	Yes	5 to 10 years	TDF/3TC/DTG	TDF/3TC/EFV	111/75	81	36	0	No	No	No	Positive	169	41	15-29	1+	Yes	Client died
200	2020-10-21	24	Female	Muganda	Married	Primary	Moslem	Operate business		No	Yes	No		No	No	No	No	No	No	No	No	NONE	No	No	No	Septrin	Positive	No		ART NAIVE		93/62	128	37	1	Yes	No	No	Positive	163	44	15-29	Negative	Yes	Client died
158	2020-10-15	76	Male	Banyakitara	Widower or Widow	Primary	Protestant	Peasant Farmer		No	Yes	Yes	Less than 2	No	No	No	Yes	No	No	No	No		No	No	No	Antihypertensives	Negative					128/79	65	370	0	No	No	No	Negative	101	72	60-89	Negative	Yes	Client died
201	2020-10-21	67	Male	Others	Widower or Widow	No Education	Catholic	Peasant Farmer		No	Yes	Yes	2 and above	Yes	No	No	No	No	No	No	No	NONE	yes	No	No	NONE	Negative					211/120	105	39	0	No	No	No	Negative	408	14	Less than 15	1+	Yes	Client died
283	2020-11-05	77	Male	Others	Married	Primary	Catholic	Peasant Farmer		Yes	Yes	Yes	2 and above	No	No	No	No	No	No	No	No	Known ISS	No	No	No	ART	Positive	Yes	10 and over year	ABC/3TC/DTG	ABC/3TC/EFV	136/84	107	37	0	No	No	No	Positive	84	89	60-89	Negative	Yes	Client died
128	2020-10-12	32	Female	Muganda	Married	Secondary	Catholic	Operate business		Yes	No	No		No	No	No	Yes	No	No	No	No		No	No	No	Antihypertensives	Negative					189/119	101	37	0	No	No	No	Negative	3901	1	Less than 15	Negative	Yes	Client died
171	2020-10-19	45	Female	Muganda	Widower or Widow	Primary	Catholic	Peasant Farmer		Yes	Yes	Yes	2 and above	No	No	No	No	Yes	No	No	No	None	yes	No	No	NONE	Negative					122/83	64	36	1	No	No	yes	Negative	1842	2	Less than 15	Negative	Yes	Client died
162	2020-10-16	88	Female	Banyakitara	Widower or Widow	No Education	Catholic	Peasant Farmer		Yes	Yes	No		No	No	No	No	No	No	No	No	NONE	yes	No	No	NONE	Negative					122/76	89	370	0	No	No	No	Negative	76	70	60-89	Negative	Yes	Client died
22	2020-09-21	49	Female	Muganda	Married	Secondary	Catholic	Unemployed		Yes	No	No		No	No	No	No	No	No	No	No	NONE	No	No	No	NONE	Positive	Yes	5 to 10 years	TDF/3TC/DTG	TDF/3TC/EFV	125/70	93	38	2	No	Yes	yes	Positive	91	74	60-89	1+	Yes	Client died
371	2020-11-27	54	Male	Muganda	Married	Primary	Moslem	Peasant Farmer		No	No	No		No	No	No	No	No	No	No	No	NO	yes	No	No	None	Negative					159/96	78	37	0	No	No	No	Negative	295	23	15-29	2+	Yes	Client died
95	2020-10-06	73	Female	Muganda	Divorced or seperated	No Education	Catholic	Peasant Farmer		Yes	Yes	Yes	2 and above	No	No	Yes	No	No	No	No	No	None	No	No	No	Anti hyperglyceamics	Negative					122/59	100	38	0	No	No	No	Negative	66	82	60-89	Negative	Yes	Client died
228	2020-11-10	74	Male	Muganda	Widower or Widow	No Education	Protestant	Peasant Farmer		Yes	No	Yes	2 and above	No	No	No	No	No	No	No	No	known ISS	No	No	No	ART, Septrin	Positive	Yes	<1 year	TDF/3TC/DTG	None	116/75	68	36	0	No	No	No	Positive	149	46	45-59	Negative	Yes	Client alive	78	98	Above 90	Negative or trace
45	2020-09-29	30	Male	Muganda	Married	Primary	Catholic	Peasant Farmer		Yes	No	Yes	Less than 2	No	No	No	No	No	No	No	No	None	yes	No	No	None	Negative					119/79	78	36	0	No	No	No	Negative	82	128	Above 90	2+	Yes	Client alive	61	148	Above 90	Negative or trace
59	2020-09-30	78	Male	Banyakitara	Married	No Education	Born Again	Peasant Farmer		No	Yes	Yes	Less than 2	No	No	No	Yes	No	No	No	No		No	No	No	Anti hypertensives	Negative					125/85	86	37	0	No	No	No	Negative	53	112	Above 90	3+ and above	Yes	Client alive	51	113	Above 90	2+
66	2020-09-28	26	Female	Muganda	Divorced or seperated	Secondary	Catholic	Unemployed		Yes	No	No		Yes	No	Yes	No	No	No	No	No		No	No	No	insulin	Negative					134/98	112	36	1	No	No	yes	Negative	104	74	60-89	1+	Yes	Client alive	77	106	Above 90	Negative or trace
141	2020-10-14	84	Male	Banyakitara	Married	Primary	Catholic	Peasant Farmer		No	Yes	Yes	2 and above	No	No	No	Yes	No	No	No	No		No	No	No	Anti hypertensives	Negative					155/69	78	35	0	No	No	No	Negative	83	86	60-89	Negative	Yes	Client alive	86	82	60-89	Negative or trace
234	2020-10-28	51	Male	Banyakitara	Married	Tertiary	Protestant	Civil/NGO servant		Yes	Yes	No		Yes	Yes	Yes	Yes	No	No	No	No		No	No	No	Anti hypertensives,Anti hypergycaemics	Negative					121/65	94	36	0	No	No	No	Negative	351	19	15-29	2+	Yes	Client alive	423	15	15-29	3+ and above
8	2020-09-18	25	Male	Muganda	Married	Secondary	Moslem	Others	Taxi driver	Yes	Yes	No		No	No	No	No	No	No	No	No		No	Yes	No		Negative					80/43	73	35	1	Yes	No	No	Negative	153	62	60-89	Negative	Yes	Client alive	95	111	Above 90	Negative or trace
105	2020-10-07	80	Female	Others	Widower or Widow	No Education	Moslem	Operate business		Yes	Yes	No		No	No	Yes	No	No	No	No	No		No	No	No	Insulin	Negative					128/71	82	36	0	No	No	No	Negative	90	60	60-89	Negative	Yes	Client alive	65	89	60-89	Negative or trace
62	2020-09-28	47	Male	Muganda	Divorced or seperated	Primary	Catholic	Peasant Farmer		No	No	No		No	No	Yes	Yes	No	No	No	No		No	No	No	Isulin,Antihypertensives	Negative					188/114	67	35	0	No	No	No	Negative	100	89	60-89	Negative or Trace	Yes	Client alive	142	58	45-59	Negative
176	2020-10-17	38	Male	Muganda	Divorced or seperated	Tertiary	Catholic	Civil/NGO servant		No	Yes	Yes	Less than 2	No	No	No	No	No	No	No	No	No	yes	No	No	No	Negative					130/72	98	36	0	No	No	No	Negative	109	86	60-89	Negative or Trace	Yes	Client alive	76	128	Above 90	Negative
296	2020-11-06	67	Female	Banyakitara	Widower or Widow	Primary	Moslem	Peasant Farmer		No	Yes	No		Yes	No	Yes	Yes	No	No	No	No		No	No	No		Negative					124/69	87	35	1	No	No	yes	Negative	87	69	60-89	Negative	Yes	Client alive	52	110	Above 90	Negative or trace
237	2020-10-28	60	Male	Muganda	Married	Primary	Catholic	Peasant Farmer		No	Yes	No		No	No	Yes	No	No	No	No	No		No	No	No	Anti hyperglyceamics	Negative					132/72	101	37	0	No	No	No	Negative	413	15	15-29	2+	Yes	Client alive	460	13	Less than 15	2+
93	2020-10-05	40	Male	Muganda	Divorced or seperated	Secondary	Moslem	Others	Mechanic	No	No	No		No	No	Yes	Yes	No	No	No	No		No	Yes	No		Negative					169/107	58	36	0	No	No	No	Negative	234	33	15-29	3+ and above	Yes	Client alive	277	27	15-29	3+ and above
358	2020-11-19	74	Male	Muganda	Married	Primary	Moslem	Operate business		Yes	Yes	No		Yes	No	No	No	No	No	No	No	NO	yes	No	No	None	Negative					132/95	107	37	0	No	No	No	Negative	90	84	60-89	1+	Yes	Client alive	77	98	Above 90	Negative or trace
286	2020-11-05	63	Female	Muganda	Widower or Widow	Secondary	Catholic	Peasant Farmer		No	No	Yes	Less than 2	No	No	No	Yes	No	No	No	No	None	No	No	Yes		Negative					85/53	92	36	1	Yes	No	No	Negative	152	36	15-29	Negative or Trace	Yes	Client alive	127	45	45-59	Trace
294	2020-10-08	80	Male	Muganda	Widower or Widow	Primary	Catholic	Peasant Farmer		No	No	No		No	No	No	Yes	No	No	No	No		No	No	No	Anti hypertensives	Negative					145/78	68	36	0	No	No	No	Negative	389	14	Less than 15	Negative	Yes	Client alive	109	64	60-89	Negative
292	2020-11-06	64	Male	Others	Widower or Widow	Primary	Moslem	Peasant Farmer		No	No	No		Yes	No	No	No	No	No	No	No	Known ISS	No	No	No	ART and Septrin	Positive	Yes	2 to <5 years	TDF/3TC/EFV	None	113/70	101	37	0	No	No	No	Positive	487	12	15-29	Negative	Yes	Client alive	109	71	60-89	2+
106	2020-10-07	85	Female	Banyakitara	Widower or Widow	No Education	Moslem	Peasant Farmer		No	Yes	No		No	No	No	Yes	No	No	No	No		No	No	No	Anti hypertensives	Negative					100/59	80	35	0	No	No	No	Negative	216	20	15-29	Negative	Yes	Client alive	83	64	60-89	Negative
360	2020-11-19	54	Male	Muganda	Married	Primary	Moslem	Operate business		No	Yes	No		No	No	Yes	No	No	No	No	No		No	No	No	Anti hyperglycaemics	Negative					145/85	90	37	0	No	No	yes	Negative	105	80	60-89	3+ and above	Yes	Client alive	82	108	Above 90	Negative
319	2020-11-12	44	Male	Muganda	Married	Primary	Moslem	Others	Fish monger	No	No	No		No	No	No	Yes	No	No	No	No		No	No	No	Anti hypertensives	Negative					162/96	82	37	0	No	No	No	Negative	747	8	Less than 15	Negative	Yes	Client alive	720	8	Less than 15	Negative
223	2020-10-26	50	Male	Muganda	Married	Primary	Catholic	Peasant Farmer		No	Yes	Yes	2 and above	Yes	No	Yes	No	No	No	No	No		No	No	No	Antihyperglyceamics	Negative					82/59	89	36	2	Yes	Yes	No	Negative	105	82	60-89	Negative or Trace	Yes	Client alive	69	122	Above 90	Negative or trace
303	2020-11-10	43	Male	Others	Divorced or seperated	Primary	Protestant	Peasant Farmer		No	Yes	No		No	No	No	No	No	No	No	No	Known ISS	No	No	No	ART, Septrin	Positive	Yes	<1 year	TDF/3TC/DTG	None	112/90	101	37	0	No	No	No	Positive	161	52	45-59	1+	Yes	Client alive	71	127	Above 90	Negative or trace
3	2020-09-17	36	Male	Muganda	Married	Secondary	Catholic	Others	fish monger	Yes	Yes	Yes	2 and above	No	No	No	No	No	No	No	No	HIV Positive	No	No	Yes	Fluconazole,Septrin	Positive	Yes	<1 year	TDF/3TC/DTG	None	134/92	70	37	1	No	No	yes	Positive	222	37	15-29	Negative	Yes	Client alive	78	128	Above 90	Negative
211	2020-10-23	47	Female	Muganda	Married	Primary	Moslem	Operate business		No	Yes	No		Yes	No	No	Yes	No	No	No	No		No	No	Yes		Negative					136/99	107	36	1	No	No	Yes	Negative	126	51	45-59	Negative	Yes	Client alive	84	83	60-89	Negative
94	2020-10-05	60	Male	Muganda	Married	Secondary	Moslem	Operate business		No	No	No		No	No	Yes	Yes	No	No	No	No		No	No	No	Anti hypertensives,Antihyperglyceamics	Negative					126/86	86	36	0	No	No	No	Negative	159	46	45-59	Negative	Yes	Client alive	159	46	45-59	Negative
225	2020-10-26	50	Male	Muganda	Married	Primary	Catholic	Peasant Farmer		No	No	Yes	2 and above	No	No	No	No	No	No	No	No		yes	No	No		Negative					112/70	68	37	0	No	No	No	Negative	103	84	60-89	Negative	Yes	Client alive	101	86	60-89	Negative
255	2020-10-30	47	Male	Muganda	Married	Primary	Moslem	Peasant Farmer		Yes	Yes	No		No	No	Yes	No	No	No	No	No		No	No	No	Insulin	Negative					121/76	74	37	0	No	No	No	Negative	160	50	45-59	Negative	Yes	Client alive	137	61	60-89	Negative
317	2020-11-12	50	Male	Muganda	Married	Primary	Catholic	Peasant Farmer		No	Yes	Yes	2 and above	yes	No	No	No	No	No	No	No	Known ISS	No	No	No	ART and septrin	Positive	Yes	5 to 10 years	TDF/3TC/DTG	None	120/90	94	37	0	No	No	No	Positive	200	38	30-44	1+	Yes	Client alive	232	32	30-44	Negative or trace
31	2020-09-21	83	Female	Muganda	Widower or Widow	Primary	Catholic	Peasant Farmer		No	No	No		No	No	No	Yes	No	No	No	No		No	No	No	Ant hypertensives	Negative					123/78	83	36	0	No	No	No	Negative	72	77	60-89	Negative	Yes	client alive	49	100	Above 90	Negative or trace
100	2021-10-06	75	Female	Muganda	Widower or Widow	Primary	Catholic	Peasant Farmer		No	Yes	No		No	No	No	Yes	No	No	No	No		No	No	No	Antihypertensives	Negative					128/81	91	36	0	No	No	No	Negative	192	25	15-29	Negative or Trace	Yes	Client alive	243	19	15-29	Negative or trace
																															#REF!
[truncated: 2 more columns]
